# Supplementary material
Source: PubMed Central journal article supplement (PMC6484807)
Supplement: jama-321-1491-s001.pdf [file jama-321-1491-s001.pdf]

1  
2  
3  
4  
5  
6  
7  
8  
9  
10  
11  
12  
13  
14  
15  
16  
17  
18  
19  
20  
21  
22  
23  
24  
25  
26  
27  
28  
29  
30  
31  
32  
33  
34  
35  
36  
37  
38  
39  
40  
41  
42  
43  
44  
45  
46

**The Impact of Workplace Wellness on Health, Health Care, and Employment Outcomes:  
A Randomized Controlled Trial<sup>†</sup>**

Zirui Song<sup>‡</sup>, Katherine Baicker<sup>§</sup>

**Analysis Plan—Phase 1  
March 15, 2018**

---

<sup>†</sup> We are grateful to Jose Zubizarreta and Anna Sinaiko for helpful comments and to Kathryn Clark and Yuanxiaoyue Yang for excellent research assistance in the preparation of this analysis plan. We are also grateful to Jack Huang and Harlan Pittell for excellent research assistance in prior years and to Bethany Maylone for expert project management. In addition, we thank our study partners, BJ’s Wholesale Club and Wellness Workdays, for their collaboration and expertise in designing and fielding the intervention. We gratefully acknowledge funding from the National Institute on Aging, the Abdul Latif Jameel Poverty Action Lab North America, and the Robert Wood Johnson Foundation.

<sup>‡</sup> Harvard Medical School and Massachusetts General Hospital

<sup>§</sup> University of Chicago Harris School of Public Policy, Harvard School of Public Health, and NBER

47 **Table of Contents**

48

49

50 Section I. Introduction .....3

51

52 Section II. Treatment: Workplace Wellness Program .....4

53

54 Section III. Randomization .....5

55

56 Section IV. Data.....6

57     A. Administrative data

58     B. Primary data

59

60 Section V. Study Sample .....16

61     A. Main sample and subsamples

62     B. Balance between treatment and control

63

64 Section VI. Statistical Analyses .....18

65     A. Intent-to-treat analysis

66     B. Local average treatment effect

67     C. Addressing the inclusion of multiple related outcomes

68     D. Pre-specified subgroup analyses

69     E. Club-level analyses

70     F. Sensitivity analyses and secondary analyses

71

72 Figures and Tables .....23

73

74 Appendices.....51

75

76

77

78 **I. Introduction**

79

80 Workplace wellness programs have become increasingly popular across the U.S. Centered on  
81 awareness, education, and the promotion of healthy behaviors for disease prevention, workplace  
82 wellness programs comprised a \$7.8 billion industry in 2016. In the face of rising health care  
83 costs for their employees, over 80 percent of large firms in the U.S. now offer a wellness  
84 program, frequently comprising a health risk assessment, biometric screenings, and a focus on  
85 topics such as weight loss, physical activity, and smoking cessation.<sup>1</sup> In addition to this massive  
86 private sector investment, the growth of workplace wellness has also been aided by public  
87 investments such as funds included in the Affordable Care Act. Despite the attention and  
88 investment in workplace wellness programs for U.S. workers, employees, and the government,  
89 little rigorous evidence exists on the effect of such programs on health and economic outcomes.

90

91 Prior studies of workplace wellness programs, largely observational in nature, have been plagued  
92 by selection bias, lack of control groups, and small samples. Evidence from the few experimental  
93 or quasi-experimental studies is mixed.<sup>2</sup> Participants in wellness programs and firms offering  
94 them are likely different from non-participants in important observed and unobserved ways that  
95 affect health outcomes. Thus, it has been difficult to identify the effect of such programs using  
96 observational studies comparing participants to non-participants. Moreover, meta-analyses have  
97 produced widely varying estimates of program benefits relative to costs.<sup>3</sup>

98

99 Through a partnership with a large multi-state U.S. employer (BJ’s Wholesale Club) and an  
100 experienced and award-winning wellness vendor (Wellness Workdays), we implemented a  
101 randomized controlled trial of a workplace wellness program beginning in 2015. The analysis  
102 plan below details the implementation of the first phase of this intervention (January 2015  
103 through June 2016) and the evaluation methodology. This analysis evaluates the impact of the  
104 workplace wellness program on employee health care spending and utilization, health outcomes,  
105 employment, and productivity.

106

107 This analysis plan seeks to pre-specify the analysis before comparing outcomes for treatment and  
108 control groups, in order to minimize issues of data mining and specification searching. To create  
109 this document, we examined data on outcomes for the control group and performed limited  
110 comparisons of non-outcome variables between the treatment and control groups (such as pre-  
111 randomization demographics). However, we have not conducted any analysis of differences in  
112 post-treatment outcomes between the treatment and control groups. Institutional review board  
113 approval was granted and maintained through Harvard University.

---

<sup>1</sup> Kaiser/HRET Survey of Employer-Sponsored Health Benefits, 2016.

<sup>2</sup> See, for example, Jones D, Molitor D, Reif J. What Do Workplace Wellness Programs Do? Evidence from the Illinois Workplace Wellness Study. NBER Working Paper No. 24229. 2018; Fries et al. Randomized controlled trial of cost reductions from a health education program: the California Public Employees’ Retirement System (PERS) study. *Am J Health Promot.* 1994;8 (3):216-23; and Leigh et al. Randomized controlled study of a retiree health promotion program. The Bank of America Study. *Arch Intern Med.* 1992;152 (6):1201-6.

<sup>3</sup> For reviews of prior experimental, quasi-experimental, and observational studies, see, for example, Baicker K, David C, Song Z. Workplace wellness programs can generate savings. *Health Affairs*, 2010;29(2): 304–311; the RAND Corporation, Mattke S, Schnyer C, Van Busum KR. A Review of the U.S. Workplace Wellness Market. 2012. ([https://www.rand.org/pubs/occasional\\_papers/OP373.html](https://www.rand.org/pubs/occasional_papers/OP373.html)).

## 114 **II. Treatment: Workplace Wellness Program**

115  
116 The treatment is a longitudinal multi-component workplace wellness program designed to  
117 improve the health and wellbeing of workers. It takes place at BJ’s Wholesale Club, the largest  
118 warehouse retail corporation in the Eastern U.S. and third largest warehouse retail company in  
119 the nation, with approximately 25,000 employees serving 9 million members. BJ’s operates  
120 about 200 “clubs” (separate worksites) from Maine to Florida and has a demographically and  
121 socioeconomically diverse workforce across a variety of work settings.

122  
123 The treatment took place in 2 phases. Phase 1 of the treatment period spanned 18 months, from  
124 January 2015 through June 2016 – and is the subject of this analysis plan (**Table 1**). In an  
125 ongoing Phase 2 of the study, the treatment was extended for another year and to additional  
126 clubs. Data for this extended treatment will be collected and analyzed separately. This treatment  
127 was designed and implemented by a third-party vendor, Wellness Workdays. Wellness  
128 Workdays is a wellness vendor that delivers and manages wellness programs across many  
129 industries, including finance, manufacturing, banking, higher education, and legal across a  
130 number of states.

131  
132 The treatment consisted of the opportunity to participate in a personal health assessment, in-  
133 person screenings, and multiple program modules. Each module took place over 4-7 consecutive  
134 weeks. The modules centered on themes such as team-based and individual wellness challenges,  
135 nutrition, stress reduction, and physical activity, as well as workplace culture. Phase 1 comprised  
136 the following 8 modules: “Take Charge of Your Health,” which taught proactive strategies for  
137 participating in health and health care; “Nutrition for a Lifetime,” which aimed to help  
138 employees achieve and maintain a healthy weight through nutrition; “Club Cardio Challenge” (2  
139 modules), which focused on cardiovascular activity; “Maintain Don’t Gain,” which combined  
140 principles of healthy nutrition with physical activity; “Power Down the Pressure,” which taught  
141 methods for stress management; “Weight Loss Boot Camp,” which focused on nutrition and  
142 exercise methods for weight loss; and “Movin’ in May,” which once again focused on physical  
143 activity with active tracking of progress. Across the program, employees had opportunities to  
144 receive incentives through completion of the personal health assessment, the biometric  
145 screenings, and participation in the individual modules of the program. Employees earned a \$50  
146 BJ’s gift card for completing both the biometric screening and personal health assessment in  
147 each round of screenings and typically received a \$25 BJ’s gift card for completion of a module,  
148 with employees who had Cigna insurance coverage able to earn an additional incentive for some  
149 of the modules. Please refer to Appendix 1 for detailed information on the components of the  
150 wellness program by module, including requirements and incentives. **Table 2** shows average  
151 participation by module across the treatment clubs for Phase 1 of the wellness program.

152  
153 In each treatment club, a Registered Dietitian employed by Wellness Workdays coordinated and  
154 led the wellness programming. The Registered Dietitians worked directly with employees in the  
155 wellness program modules, educated them about the content of the program, and led them in  
156 various creative activities such as group fitness activities and cooking demonstrations. Each  
157 Registered Dietitian had the flexibility to tailor the day-to-day programming around the themes  
158 of the modules. A Registered Dietitian spent approximately 8 hours per week at each club.

159

160 **III. Randomization**

161  
162 The wellness program was implemented in a randomly selected subset of BJ’s Wholesale Clubs.  
163 Each club is a standalone worksite, with an average of 108 employees per club. Many aspects of  
164 typical workplace wellness programs, including those studied in this context, focus on changing  
165 the workplace environment (such as changing the snacks in the breakroom or providing  
166 informational posters or seminars) and on team-based interventions (such as team step  
167 challenges) that would not be possible to evaluate with individual-level randomization within the  
168 worksite. We thus randomized our wellness intervention at the club level.

169  
170 At the beginning of the study, there were 201 BJ’s clubs in the U.S. along the East coast,  
171 extending from Maine to Florida. We eliminated 41 clubs from our sample because they were  
172 geographically remote or had employee pools with substantially different insurance coverage  
173 from the others, leaving 160 clubs in our sample.

174  
175 Among these clubs, we randomly selected 20 “treatment” clubs that would receive the wellness  
176 program and 20 “primary control” clubs for Phase 1. Data from personal health assessments and  
177 in-person biometric screenings were collected in all of the treatment and primary control clubs.  
178 **Figure 1** shows the locations of these 40 clubs. The remaining 120 clubs served as “secondary  
179 controls” in Phase 1, and were included in analyses of the administrative data that were available  
180 for all clubs.

181  
182 In Phase 2 of the treatment, we expanded fielding of the wellness program to 5 additional  
183 randomly selected treatment clubs and 5 additional randomly selected control clubs. During  
184 Phase 2 of the treatment, the 25 treatment clubs received an additional 4 modules of wellness  
185 programs.  
186

187 **IV. Data**

188

189 This analysis draws on data from 5 categories. The table below displays the source of each data  
 190 set and the study population for which it is available.

191

| <b>Summary of the Components of Data Collected</b> |                                                      |                                   |                                                |                                                   |
|----------------------------------------------------|------------------------------------------------------|-----------------------------------|------------------------------------------------|---------------------------------------------------|
| <b>Data</b>                                        | <b>Source</b>                                        | <b>Data Availability</b>          |                                                |                                                   |
|                                                    |                                                      | <b>Treatment Clubs (20 clubs)</b> | <b><u>Primary</u> Control Clubs (20 clubs)</b> | <b><u>Secondary</u> Control Clubs (120 clubs)</b> |
| <i>Administrative Data</i>                         |                                                      |                                   |                                                |                                                   |
| Employment records                                 | BJ's                                                 | All employees                     | All employees                                  | All employees                                     |
| Claims data (medical and pharmaceutical)           | Cigna (via BJ's)                                     | Employees insured by Cigna        | Employees insured by Cigna                     | Employees insured by Cigna                        |
| <i>Primary Data</i>                                |                                                      |                                   |                                                |                                                   |
| Biometric screening data                           | 3 <sup>rd</sup> party vendor (via Wellness Workdays) | Employees completing screening    | Employees completing screening                 | None (by design)                                  |
| Personal Health Assessment                         | 3 <sup>rd</sup> party vendor (via Wellness Workdays) | Employees completing survey       | Employees completing survey                    | None (by design)                                  |
| Participation in the treatment                     | Wellness Workdays                                    | All employees                     | None (by design)                               | None (by design)                                  |

192

193 A. Administrative Data

194

195 Administrative data consist of employment records and medical and pharmaceutical claims data.  
 196 Employment records include data on employment history and earnings and are available for all  
 197 employees across treatment and control clubs (both primary and secondary controls). Medical  
 198 and pharmaceutical claims data are available through Cigna for BJ's employees who are insured  
 199 through a Cigna plan, the large majority of whom are full-time employees. BJ's is a self-insured  
 200 company (i.e. it bears risk for the health care spending of its employed population), with Cigna  
 201 as the administrator of its health plans. In cross-section, approximately 35 percent of all BJ's  
 202 employees are insured through Cigna during the study period.

203

204 *A1. Employment records*

205

206 Data on employment and earnings provided by BJ's enabled us to define our sample (based on  
207 hire and termination dates) and measure key employment-related outcomes, such as absenteeism  
208 and performance reviews. Employment history data capture all employment-related events  
209 associated with an employee, such as a hire or termination. Earnings data capture the number of  
210 hours worked and dollars earned by an employee in a given pay-period for a specific type of  
211 earnings. Variables in the employment records fall into the 4 general categories below.

212

213 • **Actions:** In the employment history data, employment-related actions include hire, rehire,  
214 termination, transfer, and performance review.

215

216 • **Locations and dates:** These data describe the worksites where employees worked and the  
217 start and end dates of their employment.

218

219 • **Demographic variables:** These include date of birth, gender, and race/ethnicity. These are  
220 discussed in greater detail in the Analysis section below.

221

222 • **Earnings:** These data include number of hours worked and dollars earned by an employee in  
223 a given pay-period for a specific type of earnings (regular time, overtime, etc.).

224

225 We used these data to study several categories of outcomes:

226

227 • **Absenteeism:** We calculated absenteeism as an employee's number of sick hours plus  
228 personal hours, divided by the sum of an employee's sick, personal, and worked hours. This  
229 gives the ratio of absence relative to scheduled hours. Vacation and holiday time was  
230 excluded from both the numerator and denominator.

231

232 • **Performance review:** BJ's rates employee performance on a 5-point scale (1 through 5),  
233 with 1 representing the best performance rating and 5 the worst. Most employees have one  
234 performance review per calendar year (although not always in the year in which they are  
235 hired or terminated). We averaged performance review scores (weighted by the duration of  
236 time over which a score held) and created a binary indicator where a score of less than 3 was  
237 coded as good performance and greater than or equal to 3 as poor performance.

238

239 • **Employment tenure:** Using data on action dates and earnings, we defined when an  
240 individual was employed by BJ's and how many hours he or she worked (including the  
241 nature of those hours, such as regular hours and overtime). We defined tenure as the  
242 difference between the hire date and the latest termination date, with a maximum tenure of  
243 the entire length of the study.

244

245 **Table 3** provides summary statistics for tenure, performance review, and absenteeism gathered  
246 among the control clubs during the treatment period.

247

248 *A2. Medical and pharmaceutical claims data*

249

250 Medical claims data were provided at the individual employee level by Cigna and were used to  
251 calculate spending and utilization variables. To standardize these outcome variables to a defined  
252 period of time at the individual level, we used the enrollment file detailing the length of Cigna  
253 coverage (measured in months) for each BJ's employee covered by Cigna. These administrative  
254 data are available for all clubs (treatment, primary control, and secondary controls), but only for  
255 employees who were enrolled in a BJ's employer-sponsored Cigna health insurance plan. Full-  
256 time workers were more likely to have Cigna coverage than part-time workers.

257

258 We analyzed medical claims for BJ's employees only (excluding their dependents, who were not  
259 directly exposed to the treatment). For each employee, we included claims with service dates  
260 during the intervention period, including an additional 30 days to capture potential billing delays.

261

262 We considered the entire treatment period (January 2015 through June 2016 for Phase 1 of the  
263 wellness program) as a whole. We aggregated medical spending and utilization at the employee  
264 level across this 18-month treatment period, normalized to daily rates based on the number of  
265 days employees were insured during the treatment period. We rescaled these outcomes to annual  
266 or monthly averages for ease of interpretation. We examined the following outcomes at the  
267 individual level as well as the club level.

268

- 269 • **Total medical spending:** We defined total medical spending per year as the sum of all  
270 payments, including deductibles, copayments, coinsurance, insurance payments, and any  
271 amount paid by another carrier, that appear on an employee's claims.  
272
- 273 • **Medical spending by site of care:** We used the site of care variable in the claims data to  
274 categorize medical spending by different types of sites. These sites of care are mutually  
275 exclusive and exhaustive. The sites of care include: office, inpatient hospital, emergency  
276 department, outpatient hospital, urgent care, and other (home + SNF + missing site of care).  
277
- 278 • **Out-of-pocket medical spending:** We also examine out-of-pocket spending, defined as the  
279 sum of the deductibles, copayments, and coinsurance. Out-of-pocket spending is a subset of  
280 total medical spending.  
281
- 282 • **Utilization:** We defined a number of utilization variables:
  - 284 ▪ *Physician office visits:* We defined an office visit as a claim line with site of care as  
285 "office" and service type as "physician visit." We consider multiple claims with the same  
286 patient, service date, and provider specialty as a single office visit. We did not include  
287 office visits that occurred with the site of care as "outpatient hospital." We examined a  
288 binary indicator for whether a subject had any office visits and the total number of office  
289 visits.  
290
  - 291 ▪ *Hospitalizations:* We defined hospitalizations based on days on which a patient has a  
292 claim line with site of care "inpatient hospital" and service type "hospital visit," treating  
293 claims from the same or continuous days as a single hospitalization (being careful that a



294 missing day of hospital-specific claims did not break what otherwise appeared to be one  
295 continuous stay into two). We examined both a binary indicator for having any  
296 hospitalizations and the total number of hospitalizations.

- 297
- 298 ■ *Emergency Room visits:* ER visits were identified from claim lines with site of care  
299 “Emergency Room – Hospital” and service type “emergency facility” or “emergency  
300 medical care,” again ensuring that we do not double count ER visits when a claim for  
301 imaging, labs, or prescription drugs is received a day or two later than the actual ER visit.  
302 Similar to hospitalizations above, we treated claims for the same or continuous days as a  
303 single ER visit. We examined both a binary indicator for having any ER visits and the  
304 total number of ER visits.
  - 305
  - 306 ■ *Urgent care visits:* Urgent care visits were identified from claim lines with site of care  
307 “Urgent Care Facility.” We treated all claims from a particular day for a particular patient  
308 as one visit. We examined both a binary indicator for having any urgent care visits and  
309 the number of urgent care visits.
  - 310
  - 311 ■ *Preventive care visits:* We identified preventive care visits using CPT codes  
312 corresponding to “preventive medicine services.” These included 99384-99387 and  
313 99394-99397. We considered multiple claim lines on same day with same provider  
314 specialty to be one visit. We examined both a binary indicator for having any preventive  
315 care visits and the number of preventive care visits.
  - 316

317 While substantial additional granularity is available in the claims data, our sample sizes do not in  
318 general support condition-specific analyses. **Table 4** provides summary statistics for medical  
319 spending and **Table 5** provides summary statistics for utilization among employees insured at the  
320 control clubs during the treatment period. At the club level, control means were calculated as a  
321 weighted average across individuals, weighted by hours worked in the club.

322

323 Similar to medical claims, we used prescription drug claims to examine drug spending and  
324 utilization. We used the same method to scale drug utilization and spending as that described for  
325 medical spending and utilization above. We examined the following outcomes at the individual  
326 level as well as the club level.

- 327
- 328 • **Total prescription drug spending:** We defined total prescription drug spending as the sum  
329 of all payments, inclusive of cost-sharing, that appear on an employee’s claims at the annual  
330 level.
  - 331
  - 332 • **Out-of-pocket prescription drug spending:** Analogous to medical claims, we defined out-  
333 of-pocket spending as the sum of the deductibles, copayments, and coinsurance. Out-of-  
334 pocket spending is a subset of total prescription drug spending.
  - 335
  - 336 • **Utilization:** We defined a number of utilization variables:
  - 337

- 338       ▪ *Number of distinct drugs:* We defined number of distinct drugs as the count of different  
339 drug types (drug types are identified by generic names of drugs) a patient ever had during  
340 the study period.  
341
- 342       ▪ *Total quantity of prescriptions:* We defined total quantity of prescriptions as the sum of  
343 all prescription-months (e.g. one drug with three monthly fills was counted as three  
344 prescription-months). We also examined a binary indicator for having any prescription  
345 drugs, and a measure of the number of distinct drugs.  
346
- 347       ▪ *Quantity of medications by health condition:* We analyzed categories of common  
348 conditions and grouped medications by drug class into the following 8 health conditions:  
349 asthma, cardiovascular, diabetes, hyperlipidemia, mental health, pain, antibiotics, and  
350 other. These conditions were selected because they were more likely to be affected by the  
351 wellness treatment. We also examined binary indicators for having any prescription drugs  
352 for each of the 8 conditions.  
353

354 **Table 6** provides summary statistics for pharmaceutical spending and utilization (both total and  
355 by category of medication) among the control clubs during the treatment period. Again, at the  
356 club level, control means were weighted averages across individuals, weighted by hours worked.  
357

358

## 359 B. Primary Data

360

361 Primary data consist of biometric data collected during in-person screenings conducted by  
362 registered nurses (employed by a third-party vendor) and self-reported data gathered from  
363 concurrently administered personal health assessment surveys. For completing this primary data  
364 collection, an employee received a \$50 gift card. The participation rate was 52% in treatment  
365 clubs and 49% in control clubs. The biometric data included blood pressure, height and weight  
366 (enabling calculation of BMI), and blood measurements of cholesterol and blood sugar. Personal  
367 health assessments contain self-reported information on health behaviors, health, and wellbeing.  
368 These primary data are available for the individuals in the 20 treatment clubs and the 20 primary  
369 control clubs who completed the screenings during the summer of 2016.  
370

371

### 371 *B1. Biometric screening data*

372

373 In the treatment and primary control clubs, we conducted biometric screenings at the conclusion  
374 of the wellness modules. The screenings were conducted by registered nurses and took place in  
375 the clubs. Unlike the administrative data above, biometric data are only available for employees  
376 in the treatment and primary control clubs who opted to complete the screening.  
377

378

378 • **Total cholesterol:** We examined both total cholesterol as a continuous variable and a binary  
379 indicator of high cholesterol, defined as total cholesterol  $\geq 200$  mg/dl.  
380

381

381 • **High-density lipoprotein (HDL) cholesterol:** We examined both HDL (“good cholesterol”)  
382 as a continuous variable and a binary indicator for low HDL defined as HDL  $< 40$  mg/dl.  
383

383

- 384 • **Blood glucose:** We examined blood glucose as a continuous variable in units of mg/dl.  
385
- 386 • **Systolic and diastolic blood pressure:** We examined both blood pressure as a continuous  
387 variable and a binary indicator for high blood pressure or hypertension, with hypertension  
388 defined as systolic blood pressure  $\geq 140$  mmHg or diastolic blood pressure  $\geq 90$  mmHg.  
389
- 390 • **Body mass index (BMI):** We calculated BMI as weight in kilograms divided by the square  
391 of height in meters, and examined both a continuous measure and a binary indicator for  
392 obesity, with obesity defined as BMI  $\geq 30$ .  
393

394 **Table 7** provides summary statistics for biometric screening data among employees who were  
395 screened in the control clubs.  
396

### 397 *B2. Personal Health Assessment Data*

398  
399 At the time of the biometric screenings, we also administered personal health assessment surveys  
400 in each of the treatment and primary control clubs. Employees were asked to fill out a paper  
401 survey, in which they were asked a variety of questions relating to their medical history,  
402 screenings and exams, emotional health, sleep, physical activity, nutrition, weight management,  
403 tobacco use, and alcohol use. We use this dataset to assess the impact of the wellness program on  
404 employees' health behaviors and self-reported health status. Again, these data are only available  
405 for employees in the treatment and primary control clubs who completed the personal health  
406 assessment.  
407

408 Based on an examination of the distribution of PHA responses collected from the control group,  
409 we will examine the following outcomes.  
410

- 411 • **Screenings and exams:**

- 412
- 413     ▪ *Annual exam:* We defined having an annual exam as a binary indicator with 1 equal to  
414     answering yes to the question “Have you had a physical exam or check-up by your  
415     healthcare provider (physician or nurse practitioner) in the last 12 months?”  
416
- 417     ▪ *Flu shot:* We defined flu shot as a binary indicator with 1 equal to answering yes to the  
418     question “Do you receive the influenza vaccine (flu shot) annually?”  
419
- 420     ▪ *Percent of other recommended tests received:* We considered other commonly-  
421     recommended tests (based on respondents' age and gender) discussed in the PHA as a  
422     group and determined the share of those tests that were obtained by the respondent, based  
423     on self-reports. These other recommended tests are cholesterol level, fasting blood  
424     glucose level, blood pressure, dental exam, colon cancer screening (for individuals aged  
425     50-85), mammogram (for women aged 50-75), and pap smear (for women aged 21-65).  
426  
427  
428  
429

- 430 • **Mental health and well-being:**  
431
- 432 ▪ *PHQ-2 score:* We used the PHQ-2, a pair of rapid depression screening questions that is  
433 commonly used in the primary care setting, to calculate a score for everyone who was  
434 screened. Individuals with a score of 3 or higher (the recommended cut-off) were flagged  
435 as possibly having depression.  
436
  - 437 ▪ *SF-8 score:* We used the eight question SF-8 health survey to measure self-reported  
438 functional health and well-being. We examined two validated scales from this survey as  
439 continuous variables: the physical summary score and the mental summary score.<sup>4</sup>  
440
  - 441 ▪ *Stress at work:* We defined stress at work using answers to the question “How often have  
442 you found yourself stressed or worried about problems as work?” Answer choices that we  
443 defined as 1 indicating stress included “sometimes,” “fairly often,” or “very often.”  
444 Answer choices “almost never” or “never” were coded as 0.  
445
  - 446 ▪ *Unmanaged stress:* We examined a binary indicator for the presence of unmanaged  
447 stress. Individuals were asked whether they had stress in their life, and: “Stress  
448 management includes regular relaxation, physical activity, talking with others or making  
449 time for social activities. Do you effectively practice stress management in your daily  
450 life?” Those who declared that they had no stress or answered “yes” to this question were  
451 coded as 0, while those who had stress and answered “no” were coded as 1.  
452
- 453 • **Sleep:** We created a binary indicator for getting an adequate amount of good quality sleep  
454 per night. This variable is based on responses to two questions: “Do you consider [the  
455 amount of sleep you reported getting] adequate for you?” and “Do you consider the quality  
456 of your sleep to be good?” Individuals who responded yes to both questions were coded as 1,  
457 while individuals who responded no to one or both questions were coded as 0.  
458
- 459 • **Physical activity:**  
460
- 461 ▪ *Regular exercise:* We defined regular exercise as answering yes to the question “Do you  
462 engage in regular exercise according to any of the definitions listed?” The provided  
463 definition of regular exercise read “Regular exercise means doing: moderate physical  
464 activity that increases your breathing rate and causes you to break a light sweat (such as  
465 brisk walking, golf, or raking leaves) for at least 150 minutes (2 hours and 30 minutes)  
466 each week OR vigorous physical activity that causes big increases in your breathing and  
467 heart rate and makes conversation difficult (such as jogging or running) for at least 75  
468 minutes (1 hour and 15 minutes) each week OR a mix of moderate and vigorous physical  
469 activity that is equal to at least 150 minutes of moderate activity, such as 90 minutes of  
470 moderate activity and 30 minutes of vigorous activity each week.”  
471

---

<sup>4</sup> Ware JE, Kosinski M, Dewey JE, Gandek B. How to Score and Interpret Single-Item Health Status Measures: A Manual for Users of the SF-8 Health Survey. Lincoln RI: QualityMetric Incorporated, 2001.

- 472
- 473
- 474
- 475
- 476
- 477
- 478
- 479
- 480
- 481
- 482
- 483
- 484
- 485
- 486
- 487
- 488
- 489
- 490
- 491
- 492
- 493
- 494
- 495
- 496
- 497
- 498
- 499
- 500
- 501
- 502
- 503
- 504
- 505
- 506
- 507
- 508
- 509
- 510
- 511
- 512
- 513
- 514
- 515
- 516
- *3+ days moderate exercise*: We defined this binary indicator as answering the question “During a typical week, on how many days do you do moderate physical activity or exercise that causes light sweating or slight to moderate increases in your breathing or heart rate (pulse)?” with a number greater than or equal to 3 days.
  - *Number of days per week intentionally increase activity*: This continuous variable was defined as an individual’s answer to the question “During a typical week, on how many days do you intentionally increase your activity level by going for walks, parking farther away, or taking the stairs rather than the elevator?”
  - *Number of hours sitting per day*: This continuous variable was defined as an individual’s answer to the question “How many hours per day do you sit? Please consider time at work and at home and include activities such as sitting in front of a computer or television.”
- **Nutrition:**
    - *Number of meals eaten out*: This continuous variable was defined as an individual’s answer to the question “During a typical week, how many meals do you eat at a fast-food, casual dining, or sit down restaurant?”
    - *Number of sweetened drinks per days*: This continuous variable was defined as an individual’s answer to the question “How many naturally or artificially sweetened beverages do you consume per day? Please include regular and diet soft drinks, energy, and sports drinks.”
    - *Read the Nutrition Facts panel*: We defined this binary indicator as 1 if individuals responded yes to the question “Do you read the Nutrition Facts panel on food labels?”
    - *Consume at least 2 cups of fruit and 2.5 cups of vegetables per day*: We defined this binary indicator as 1 if individuals responded yes to the question “Do you eat at least 2 cups of fruit and 2<sup>1</sup>/<sub>2</sub> cups of vegetables per day?”
    - *Choose whole grain foods and reduced fat foods more often than the regular variety*: We defined this binary indicator as 1 if individuals responded yes to both questions “Do you choose 100% whole grain bread, pasta, rice, cereal and crackers more often than the regular (white) variety?” and “Do you choose low fat or reduced fat items more often than regular or full-fat products?” Individuals who responded no to one or both questions were coded as a 0.
  - **Weight Management:**
    - *Considering losing weight*: We defined this as responding yes to the question “Are you seriously considering trying to lose weight to reach your goal in the next 6 months?”

- 517       ▪ *Actively managing weight:* We defined this as responding yes to either or both of the  
518       questions “In the past month, have you been actively trying to lose weight?” and “In the  
519       past month, have you been actively trying to keep from gaining weight?” A response of  
520       no to both questions was coded as a 0.  
521
- 522       • **Smoking:** This binary indicator was coded as 0 for people who responded that they had  
523       never smoked, were not regular smokers, or had quit smoking, and was defined as 1 for those  
524       who reported that they had smoked in the past and had not quit smoking.  
525
  - 526       • **Alcohol use:** This continuous variable was defined using two questions: “How many drinks  
527       do you have on a typical weekend day?” and “How many drinks do you have on a typical  
528       weekday?” The response to the first question was multiplied by two and the response to the  
529       second multiplied by five, and these two were added together to get a number of drinks per  
530       week.  
531
  - 532       • **Medical utilization:**  
533
  - 534       ▪ *Doctor visits in the last 12 months:* We defined the number of doctor visits as an  
535       individual’s response to the question “In the last 12 months, how many times did you go  
536       to a doctor’s office, clinic, or other health care provider to get care for yourself? Don’t  
537       include emergency room or hospital visits. Your best estimate is fine.” Responses are  
538       truncated at a number of 3 visits, with 3 representing 3 or more visits. We also examined  
539       a binary indicator for having any visit.  
540
  - 541       ▪ *Any ER visit in the last 12 months:* We defined this binary indicator as equal to 1 if the  
542       response to the question “In the last 12 months, how many times did you go to an  
543       emergency room to get care for yourself? Your best estimate is fine.” was greater than or  
544       equal to 1 visit.  
545
  - 546       ▪ *Days spent in a hospital:* This continuous variable was defined as the response to the  
547       question “In the last 12 months, how many total days did you spend in a hospital? Your  
548       best estimate is fine.”  
549
  - 550       ▪ *Ever a hospital patient in the last 12 months:* We defined this binary indicator as equal to  
551       1 if days spent in a hospital was greater than or equal to 1 day.  
552
  - 553       ▪ *Number of different prescriptions in the last 12 months:* This continuous variable was  
554       defined as the response to the question “In the last 12 months, how many different  
555       prescription medications did you regularly take every day? Your best estimate is fine.”  
556       Responses are capped at 6 prescriptions, with 6 representing 6 or more prescriptions.  
557
  - 558       ▪ *Any prescriptions in the last 12 months:* We defined this binary indicator as equal to 1 if  
559       number of different prescriptions in the last 12 months was greater than or equal to 1  
560       prescription.  
561

562 **Table 8** provides summary statistics for the PHA survey data among employees who completed  
563 the PHA in the control clubs.

564  
565 *B3. Program participation data*

566  
567 One of our key independent (right-hand-side) variables is participation in the wellness program.  
568 Each module had its own set of requirements that defined completion of the module, along with  
569 financial incentives attached to participation or completion, as described in Appendix 1. We  
570 examined 3 different participation metrics based on the number of modules of the wellness  
571 program completed.

- 572  
573 • **Participation indicator:** We defined a binary indicator of participation based on completing  
574 at least one module (any module) in Phase 1 of the wellness program. This is our primary  
575 definition of participation.
- 576  
577 • **High participation:** We defined a second binary indicator based on completing 3 or more  
578 modules in Phase 1. We selected 3 modules as the cutoff given that, conditional on  
579 completing at least one module, 3 was the median of the distribution of modules completed  
580 in the study population.
- 581  
582 • **Modules completed:** We also examined a continuous measure of the number of modules  
583 completed in Phase 1, which ranges from 0 to 8.

584  
585 **Table 13** provides control means of the above three definitions of Participation and first stage  
586 estimates of the impact of Treatment on these alternate definitions of Participation.

587 **V. Study Sample**

588

589 A. Main sample and subsamples

590

591 Our analysis draws on two study samples. Our main study sample comprised all employees who  
592 worked at BJ's Wholesale Clubs during any part of the study period. Each worker was weighted  
593 by the share of the study period s/he was employed at BJ's (described below).

594

595 One potential drawback of this broad sample inclusion criterion is the potential for endogenous  
596 entry or exit based on the treatment itself. For example, a worker's decision to join or exit BJ's  
597 could be a function of the availability of the wellness program. We can assess endogenous entry  
598 and exit directly in the data by testing whether the treatment affects job tenure, as in Table 3  
599 (although this cannot address any endogenous change in the type of workers attracted to BJ's).

600

601 To (partially) address the issue of endogenous tenure, we also defined an alternative sample  
602 based on a reasonably stable subsample of employees who were continuously employed at BJ's  
603 in the 13 weeks immediately preceding the treatment. This "stably employed" subsample is thus  
604 immune from endogenous entry or composition, as it is defined based on presence in the sample  
605 in advance of the intervention. Members of this subsample were also much more likely to be  
606 employed at the end of the study period, as shown below. The choice of inclusion criteria (13  
607 weeks of employment pre-randomization) was made to balance sample size and stability of  
608 employment going forward. Additional details on the construction of this subsample are  
609 provided in Appendix 2.

610

611 Exit from this sample may still potentially be endogenous, however, if the treatment affects  
612 whether workers remain employed at BJ's. There are two additional strategies for addressing this  
613 issue. First, we will assess the magnitude of any differential exit between treatment and control  
614 clubs empirically. We can then gauge the potential bias introduced from any observed  
615 differential exit using a bounding exercise. We similarly defined a subset of the stably employed  
616 subsample of employees who were continuously covered under Cigna insurance at BJ's in the 13  
617 weeks immediately preceding the treatment at BJ's to address the issue of endogenous entry into  
618 Cigna insurance. This population is used to analyze claims-based outcomes that were only  
619 available for those with Cigna insurance.

620

621 Last, we also perform analysis at the club level. This level of analysis abstracts from individual-  
622 level employee turnover (under the assumption that the total size of the BJ's employee pool is  
623 exogenous), focusing on club-level employment and health care spending outcomes. To create  
624 aggregated data at the club level, we collapsed employee-level data to the club level as described  
625 in section VI below.

626

627 **Table 9** provides a summary of demographic characteristics of the main sample and subsamples  
628 using data from control clubs.

629

630

631

632



633 B. Balance between treatment and control groups

634

635 We tested balance between treatment and control groups on observable baseline characteristics.  
636 We examined balance on demographic variables (age, sex, and race) for all of the key analytical  
637 samples. We also examined balance on baseline job and employment characteristics in the pre-  
638 intervention period for the stably employed subsample (as they by definition were in the data  
639 prior to the intervention). To augment club level analyses of balance, we added estimates of  
640 county-level characteristics from the 2015 U.S. Census Bureau matched to the locations of each  
641 club.

642

643 As **Table 10** demonstrates at the employee level, our randomly assigned clubs were balanced on  
644 some employee characteristics but not others. Notably, individuals in the treatment clubs were,  
645 on average, older (by 1-2 years, depending on the sample) and more likely to be white (by about  
646 6-9 percentage points) than individuals in control clubs. This was consistent across the overall  
647 sample and subsamples of employees who completed the PHA and were enrolled in Cigna. On  
648 the other hand, observable employment characteristics (worker type, annual compensation rate,  
649 hours worked per week, and job category) were largely balanced between treatment and control  
650 for the “stably employed” subsample for whom they were observed at baseline.

651

652 Balance at the club level was analyzed using club-level measures derived from a weighted  
653 average of individual-level measures, weighted by individuals’ hours worked. This imbalance at  
654 the individual level was also present after collapsing employees to the club level (**Table 11**).

655

656 To assess whether the imbalance was related to the overall demographics of where treatment  
657 clubs and control clubs were located in the U.S., we examined similar population characteristics  
658 of the counties in which the clubs were located using 2015 data from the U.S. Census Bureau.  
659 This showed a similar imbalance relative to that seen at the individual level, suggesting that the  
660 imbalance was at least in part driven by underlying differences in population characteristics of  
661 the areas where the clubs were located, from which the workforce was presumably drawn. This  
662 is also consistent with qualitative assessment of Figure 1, which shows, for example, treatment  
663 clubs were disproportionately represented in Ohio and Virginia, while control clubs were more  
664 likely to be located in Florida.

665

666 To deal with the imbalance on observable characteristics, we followed two strategies. First, in all  
667 specifications we controlled for the baseline demographic characteristics. Second, in our primary  
668 analyses we weighted the treatment and control groups on observed age, sex, and race so that  
669 both samples resembled the entire employee population. Neither of these strategies fully  
670 inoculates us against the possibility that, just as our random draw was by chance imbalanced on  
671 some demographic characteristics, our sample might be imbalanced on unobservable  
672 characteristics that are imperfectly correlated with observables for which we control and that also  
673 affect the outcomes of interest. While this is of course a possibility (as with many similar  
674 designs), we are less concerned given the balance on baseline employment characteristics.

675

676

677 **VI. Statistical Analyses**

678

679 Analyses will be conducted at the individual employee level and at the club level.

680

681 A. Intent-to-treat analysis

682

683 In the intent-to-treat analysis at the individual level, our goal is to estimate the average effect of a  
684 worker being randomized into a treatment club vs. a control club on outcomes of interest. We use  
685 a model that includes a treatment indicator capturing whether an individual was employed at a  
686 treatment vs. a control club. Individual-level observations were weighted based on the share of  
687 the intervention period during which the individual was employed at BJ's – or exposure to the  
688 intervention (discussed below). The model aims to answer the question: what is the effect of  
689 offering an individual the opportunity to participate in a wellness program? It is worth noting  
690 that in our experimental setting, individuals who worked at a treatment club but did not elect to  
691 participate actively in any of the wellness programming may still be “exposed” to the  
692 intervention by, for example, seeing posters in the common areas, sampling the healthier food  
693 made available in break rooms, or hearing about activities from participants at the club.

694

695 
$$Y_{ij} = \beta_0 + \beta_1 TREATMENT_j + \beta_2 X_{ij} + \varepsilon_{ij} \tag{1}$$

696

697 In this representative estimating equation,  $Y_{ij}$  denotes an outcome of interest for individual  $i$  who  
698 is employed in club  $j$ , such as medical spending.  $TREATMENT_j$  is a binary indicator of whether  
699 the individual's club was randomized into the treatment or control arm. A small share of  
700 employees (2.6%) appeared in more than one club during the study period. We defined each  
701 individual's treatment or control status using the status of the club where the individual was  
702 originally employed, given that subsequent movement between clubs could in theory be  
703 endogenous. Standard errors are clustered by club.

704

705 The coefficient on  $TREATMENT_j$  ( $\beta_1$ ) indicates the effect of being randomized into a treatment  
706 club, or the intent-to-treat (ITT). The ITT estimate is informative for employers considering  
707 implementing a wellness program.  $X_{ij}$  represents a vector of covariates that may help improve  
708 precision as well as account for chance differences in characteristics between treatment and  
709 control groups. These include:

710

- 711 • Age indicators: <20 years (omitted), 20-34, 35-49, 50-64, 65 and greater.
- 712 • Sex indicator: male (omitted), female
- 713 • Age-sex interactions
- 714 • Race: white (omitted), black, Hispanic, and other
- 715 • Employment characteristics (measured at baseline for the stably employed subsample): full-  
716 time vs. part-time, employee type (salaried vs. hourly), job category (sales vs. non-sales vs.  
717 other)

718

719 We used two sets of weights in our primary analysis. First, each individual was assigned an  
720 “exposure” weight based on the extent of his or her exposure to the wellness program (i.e. the  
721 treatment) during the study period. Many BJ's employees joined or left BJ's employment during  
722 the course of this 18-month intervention. Moreover, many worked far less than full time.

723 Outcomes for individuals with minimal exposure to the intervention are unlikely to be responsive  
 724 to their small amount of time spent in a treatment vs. control club. Exposure weights are one way  
 725 to account for this; an alternative would be estimating a dose-response model. We calculated this  
 726 exposure weight using data on duration of employment and hours worked provided by BJ's. We  
 727 summed the number of hours actually worked during the treatment period and divided by the  
 728 number of hours a full-time employee would have worked during the study period, with weights  
 729 resulting between 0 and 1. For example, a half-time worker who was employed for half of the  
 730 treatment period would be assigned a weight of 0.25. See **Table 12A** for summary statistics of  
 731 these weights in the control group. Due to the potential endogeneity with the treatment, we did  
 732 not examine the distribution across the treatment group prior to conducting the analysis. We will  
 733 test the balance on exposure weights between control and treatment groups similarly to the  
 734 balance tests in **Table 10**, though without the weight for exposure.

735  
 736 Second, given that the treatment and control groups were not perfectly balanced on the set of  
 737 observable characteristics after randomization, we derived a second set of weights that achieve  
 738 balance between treatment and control workers on age, sex, and race—attributes that are not  
 739 plausibly affected by the intervention. These balance weights were constructed to balance the  
 740 demographic characteristics between the treatment and control groups with minimum variance  
 741 between the weights, and were calibrated to be representative of the demographic attributes of  
 742 the entire study population. This method has been shown to perform better than a model-based  
 743 approach that fits a propensity score.<sup>5</sup> See **Table 12B** for summary statistics of the balance  
 744 weights between the treatment and control groups. In primary analyses, we use a composite  
 745 weight constructed by multiplying the exposure weights and the balance weights together. In  
 746 secondary analyses, we reassess a set of key outcomes using only the exposure weights.

747  
 748 B. Local average treatment effect

749  
 750 While our ITT analysis above explores the effect of being randomized into a treatment club, a  
 751 related but distinct question is: what is the effect of participating in the wellness program on the  
 752 outcomes of interest? This second question will produce a different estimate because not all  
 753 employees in treatment clubs chose to participate. Some may not have found the wellness  
 754 program appealing, for example. Because of this endogenous participation choice, comparing  
 755 those who participate in treatment clubs to all employees in control group clubs may produce  
 756 biased estimates of the effect of participation. We therefore model the impact of participation on  
 757 outcomes using a two-stage least squares (2SLS) specification:

758  
 759 
$$Y_{ij} = \gamma_0 + \gamma_1 PARTICIPATION_{ij} + \gamma_2 X_{ij} + \mu_{ij} \tag{3}$$

760  
 761 where the endogenous *PARTICIPATION* variable is estimated via the first stage regression:

762  
 763 
$$PARTICIPATION_{ij} = \pi_0 + \pi_1 TREATMENT_j + \pi_2 X_{ij} + v_{ij} \tag{4}$$

---

<sup>5</sup> Zubizarreta JR. Stable weights that balance covariates for estimation with incomplete outcome data. *Journal of the American Statistical Association*. 2015 Sep;110(511):910-922; Wang X, Zubizarreta JR. Minimal approximately balancing weights: Asymptotic properties and practical considerations. *Biometrika*. 2017;103(1):1-22; Hirshberg DA, Zubizarreta JR. On two approaches to weighting in causal inference. *Epidemiology*. 2017;28(6):812-816.

764  
765  $\gamma_1$  is the local average treatment effect (LATE) of participating in the wellness program. **Table**  
766 **13** shows the results of estimating equation (4) for alternative definitions of participation. Our  
767 preferred specification uses the binary indicator for whether a person ever participated in any  
768 module the wellness program during the study period. In alternative specifications, we apply  
769 alternative definitions of participation including and indicator for participating in 3 or more  
770 modules and a continuous measure of the number of modules completed.

771  
772 If no one in the control group received the treatment, we might interpret the 2SLS LATE as a  
773 treatment on the treated (TOT). This is nearly true by definition because, by construction, the  
774 control clubs did not have access to the wellness program modules. However, because we assign  
775 employees to clubs based on their initial locations of employment at the beginning of the study  
776 period, a few individuals in the data who moved from control clubs to treatment clubs during the  
777 study period did receive an opportunity to participate in the program. This accounts for the fact  
778 that the control group means in **Table 13** are nearly, but not exactly, zero.

779  
780 C. Addressing the inclusion of multiple related outcomes  
781  
782 We have multiple measures that capture closely related outcomes. This introduces two issues:  
783 first, combining information from these metrics may increase power. Second, we need to account  
784 for the multiple estimates of closely related outcomes in our inferential statistics.

785  
786 We assessed groups of related outcomes by pre-specifying three standardized treatment effects.  
787 Specifically, we generated standardized treatment effects for each of the following groups:

- 788
- 789 • Biometrics (systolic and diastolic BP, cholesterol, HDL, glucose, BMI)
  - 790 • Health behaviors (all PHA outcomes except emotional health and medical utilization)
  - 791 • Mental health and well-being (all of the mental health and well-being outcomes in the
  - 792 PHA)

793  
794 We conduct multiple inference adjustment within categories of outcomes. We adjusted for the  
795 number of outcomes tested within domains – largely as defined by the outcomes grouped within  
796 a particular table.

797  
798 For each outcome, we report standard, per-comparison p-values and adjusted “family-wise” p-  
799 values that take into account the multiple related outcomes we pre-specified within each outcome  
800 category. The adjusted p-value speaks to the probability of rejecting the null hypothesis (i.e. no  
801 effect of the intervention) on a given outcome under the null hypothesis that the intervention had  
802 no effect on any of the outcomes in that category. We used the Westfall and Young method for  
803 calculating these adjusted p-values (which, unlike the Bonferroni method, does not assume  
804 independence across the outcomes within a category).<sup>6</sup>

805  

---

<sup>6</sup> See, for example, Westfall PH, Young SS. Resampling-based multiple testing: Examples and methods for p-value adjustment. Wiley & Sons, 1993, and Kling JR, Liebman JB, Katz LF. Experimental Analysis of Neighborhood Effects. *Econometrica*. 2007;75(1):83-119.

806 D. Pre-specified subgroup analyses

807

808 We will perform two subgroup analyses at the individual level. We will assess differences in the  
809 effect of the wellness program by age and sex—two dimensions along which we observed fairly  
810 substantial differences in means between the treatment and control groups (**Table 14**)—via  
811 interaction terms. Equation 5 shows this interaction in our base ITT framework for age  
812 (characterized by an indicator for being age 40 or over).

813

$$814 Y_{ij} = \beta_0 + \beta_1 TREATMENT_j + \beta_2 Age40_i * TREATMENT_j + \beta_3 X_{ij} + \varepsilon_{ij} \quad (5)$$

815

816 The effect of the wellness program on those under 40 is estimated by  $\beta_1$ , while the effect for  
817 those 40 and older is estimated by the sum of the coefficients  $\beta_1 + \beta_2$ . Age categories continue to  
818 be included in covariates  $X$ .

819

820 E. Club-level analyses

821

822 We complement our analyses at the individual level with analyses at the club level. Club-level  
823 data were generated by aggregating employees assigned to clubs based on their first appearance  
824 in the data. We regression-adjust for demographics at the individual level before aggregation,  
825 and weight individuals based on their hours worked to form club-level averages. The resulting  
826 club-level dataset comprised 160 data points, one for each club (20 intervention, 20 primary  
827 control, and 120 secondary control).

828

829 We focus on outcomes measured in administrative data for all employees, dictated by data  
830 availability but also representing the employer perspective on aggregate outcomes affected by  
831 the decision to have a wellness program. Our estimation equation is:

832

$$833 Y'_j = \beta_0 + \beta_1 TREATMENT_j + \varepsilon_j \quad (6)$$

834

835 In equation (6), the subscript  $j$  denotes a club.  $Y'_j$  represents a club-level average outcome.  
836  $TREATMENT_j$  is a binary indicator of randomization into treatment the treatment group, with  $\beta_1$   
837 indicating the average club-level effect of being randomized into treatment. Covariates were, as  
838 noted, incorporated at the individual level before aggregation. Standard errors were adjusted for  
839 heteroscedasticity.

840

841 F. Sensitivity analyses and secondary analyses

842

843 In the statistical analyses above, our base regression models use least squares specifications  
844 (OLS for ITT, 2SLS for LATE) for both continuous and binary outcomes. This approach has  
845 both strengths and weaknesses.<sup>7</sup> To test the robustness of our results, we estimate alternative  
846 functional forms, notably logit models for binary outcome variables.

---

<sup>7</sup> See, for example, Buntin MB, Zaslavsky AM. Too much ado about two-part models and transformation? Comparing methods of modeling Medicare expenditures. *J Health Econ.* 2004 May;23(3):525-42; Manning WG, Basu A, Mullahy J. Generalized modeling approaches to risk adjustment of skewed outcomes data. *J Health Econ.* 2005 May;24(3):465-88.

847  
848 As noted above, in secondary analyses we reassessed a set of key outcomes using the exposure  
849 weights without the balance weights. The key outcomes were: total medical spending, total  
850 prescription drug spending, absenteeism, systolic blood pressure, BMI, annual exam (binary),  
851 SF-8 mental and physical health score, regular exercise, number of sweetened drinks per day,  
852 smoking (binary), and the number of alcoholic drinks consumed per week.

853  
854 Given uncertainty about the functional form of the effect of participation in a multifaceted  
855 program on outcomes, we also test the sensitivity of our results using alternative definitions of  
856 participation. Specifically, we tested a definition of participation based on a threshold of  
857 completing at least 3 modules, as well as a continuous metric of participation as the number of  
858 modules completed. We present the results of these sensitivity and secondary analyses in  
859 additional tables that allow comparison to the main estimates.

860

861 **Figure 1: Location of Treatment and Control Clubs**  
862

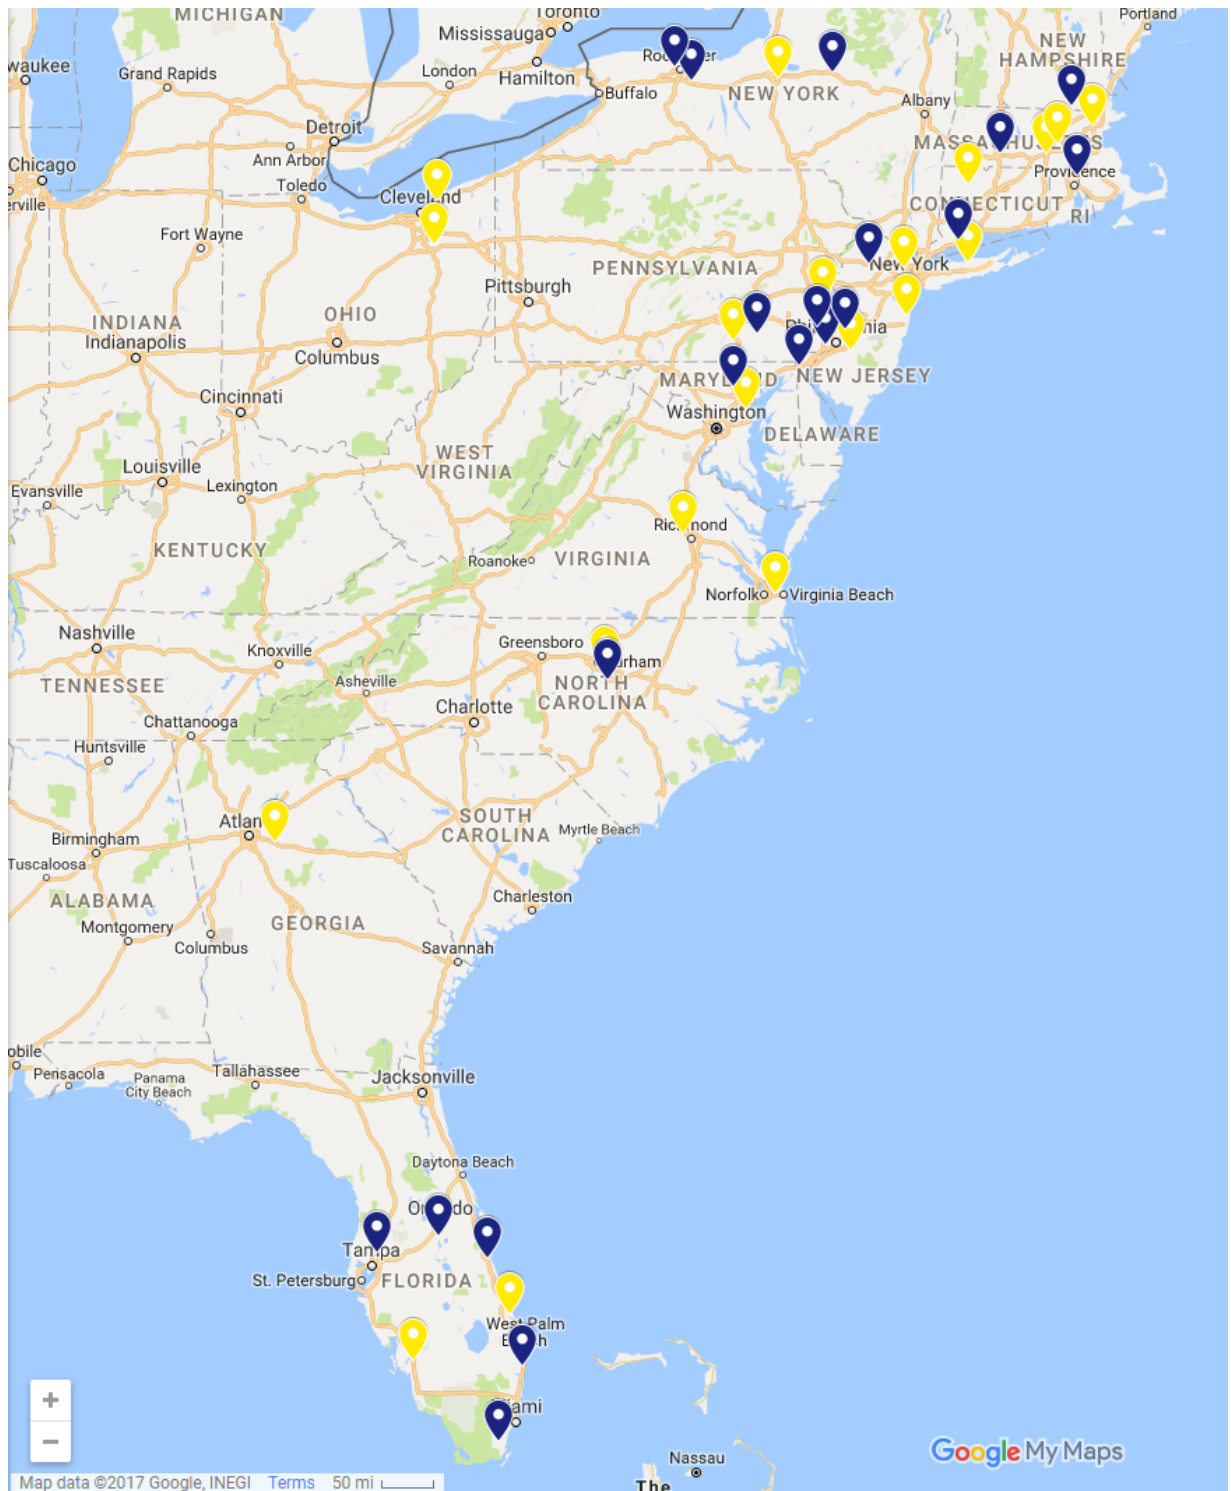

863  
864  
865 **Notes:** This map shows the 20 treatment and 20 control clubs in Phase 1 of the treatment. Yellow  
866 markers designate treatment clubs. Blue markers designate control clubs.  
867

868  
869

**Table 1: Timeline of the wellness programs**

| Events                                  | Phase 1                |   |   |   |   |   |                                                                 |   |   |    |    |    |      |   |   |   |   |   |   |   |   | Phase 2 begins<br>↓ |    |    |
|-----------------------------------------|------------------------|---|---|---|---|---|-----------------------------------------------------------------|---|---|----|----|----|------|---|---|---|---|---|---|---|---|---------------------|----|----|
|                                         | Program announced<br>↓ |   |   |   |   |   | Registered Dietitians begin working in the treatment clubs<br>↓ |   |   |    |    |    |      |   |   |   |   |   |   |   |   |                     |    |    |
| Year                                    | 2015                   |   |   |   |   |   |                                                                 |   |   |    |    |    | 2016 |   |   |   |   |   |   |   |   |                     |    |    |
| Month                                   | 1                      | 2 | 3 | 4 | 5 | 6 | 7                                                               | 8 | 9 | 10 | 11 | 12 | 1    | 2 | 3 | 4 | 5 | 6 | 7 | 8 | 9 | 10                  | 11 | 12 |
| Screenings Round 1                      |                        | ■ |   |   |   |   |                                                                 |   |   |    |    |    |      |   |   |   |   |   |   |   |   |                     |    |    |
| Module 1. Take Charge of Your Health    |                        | ■ | ■ | ■ | ■ |   |                                                                 |   |   |    |    |    |      |   |   |   |   |   |   |   |   |                     |    |    |
| Module 2. Nutrition for a Lifetime      |                        |   |   |   |   | ■ | ■                                                               |   |   |    |    |    |      |   |   |   |   |   |   |   |   |                     |    |    |
| Module 3. Club Cardio Challenge Round 1 |                        |   |   |   |   |   |                                                                 | ■ | ■ |    |    |    |      |   |   |   |   |   |   |   |   |                     |    |    |
| Module 4. Club Cardio Challenge Round 2 |                        |   |   |   |   |   |                                                                 |   |   | ■  | ■  |    |      |   |   |   |   |   |   |   |   |                     |    |    |
| Module 5. Maintain Don't Gain           |                        |   |   |   |   |   |                                                                 |   |   |    |    | ■  |      |   |   |   |   |   |   |   |   |                     |    |    |
| Module 6. Power Down the Pressure       |                        |   |   |   |   |   |                                                                 |   |   |    |    |    |      | ■ |   |   |   |   |   |   |   |                     |    |    |
| Module 7. Weight Loss Boot Camp         |                        |   |   |   |   |   |                                                                 |   |   |    |    |    |      |   |   | ■ |   |   |   |   |   |                     |    |    |
| Module 8. Movin' in May                 |                        |   |   |   |   |   |                                                                 |   |   |    |    |    |      |   |   |   | ■ |   |   |   |   |                     |    |    |
| Screenings Round 2                      |                        |   |   |   |   |   |                                                                 |   |   |    |    |    |      |   |   |   |   | ■ | ■ | ■ |   |                     |    |    |

870  
871  
872  
873  
874  
875  
876

**Notes:** This table presents a graphical illustration of Phase 1 of the wellness program. The treatment began in 2015 with announcements of the wellness program club assignments (treatment clubs) in January followed by administration of the personal health assessments and in-person screenings in February. Phase 1 comprised 8 modules and concluded at the end of June 2016. After Phase 1, personal health assessments and in-person screenings were conducted during the summer of 2016. Afterwards, Phase 2 of the wellness program began in the fall of 2016. Due to an imbalance in the participation rates in the first screenings, data from Screenings Round 1 is excluded from our analysis.



877 **Table 2: Average Participation Rates by Module, Phase 1**

878

879

|         | Take Charge<br>of Your<br>Health | Nutrition for<br>a Lifetime | Club Cardio<br>Challenge<br>Round 1 | Club Cardio<br>Challenge<br>Round 2 | Maintain<br>Don't Gain | Power Down<br>the Pressure | Weight Loss<br>Boot Camp | Movin' in<br>May |
|---------|----------------------------------|-----------------------------|-------------------------------------|-------------------------------------|------------------------|----------------------------|--------------------------|------------------|
| Overall | 12.2%                            | 25.6%                       | 37.7%                               | 28.6%                               | 31.6%                  | 33.4%                      | 28.7%                    | 28.5%            |

880 **Notes:** Participation rate is calculated as the percentage of individuals who completed a module out of the number of employees eligible to  
 881 complete a module during the time frame that the module was running. Participation is equivalent to completion of a module, with an incentive of  
 882 a gift card for completion of the module. Employees could only participate in the Take Charge of Your Health module once, though it was run  
 883 twice. Club Cardio Challenge had two rounds and completion of either round 1 or round 2 earned a gift card; completion of both rounds did not  
 884 earn an additional gift card, but rather an entry into a raffle for a Fitbit, unless the employee had Cigna health insurance in which case they could  
 885 complete both rounds of Club Cardio Challenge for an additional fitness reimbursement. Numbers are weighted by the number of days an  
 886 individual was working during a given module's timeframe.

887

888 **Table 3: Impact on Employment**

889

|                                     | Employee-level                    |                             |                  | Stably Employed Subsample         |                             |                  | Club-level                        |                             |                  |
|-------------------------------------|-----------------------------------|-----------------------------|------------------|-----------------------------------|-----------------------------|------------------|-----------------------------------|-----------------------------|------------------|
|                                     | Mean Value<br>in Control<br>Group | Reduced<br>Form<br>(Linear) | 2SLS<br>(Linear) | Mean Value<br>in Control<br>Group | Reduced<br>Form<br>(Linear) | 2SLS<br>(Linear) | Mean Value<br>in Control<br>Group | Reduced<br>Form<br>(Linear) | 2SLS<br>(Linear) |
|                                     | (1)                               | (2)                         | (3)              | (1)                               | (2)                         | (3)              | (1)                               | (2)                         | (3)              |
| Absenteeism (%)                     | 2.63<br>(1.64)                    |                             |                  | 2.86<br>(1.63)                    |                             |                  | 2.57<br>(0.36)                    |                             |                  |
| Performance<br>Review (% $\geq 2$ ) | 60.48<br>(48.89)                  |                             |                  | 66.49<br>(47.20)                  |                             |                  | 59.04<br>(13.72)                  |                             |                  |
| Tenure (days<br>during treatment)   | 467.61<br>(137.34)                |                             |                  | 515.18<br>(88.92)                 |                             |                  | 466.30<br>(19.75)                 |                             |                  |
| N                                   | 32973                             |                             |                  | 15344                             |                             |                  | 160                               |                             |                  |

**Notes:** Table reports the coefficient on TREATMENT from estimating equation (1) by OLS (column 2), and the coefficient on PARTICIPATION from estimating equation (2) by IV (column 3). Standard errors are listed in parentheses with p-values in brackets and family-wise p-values in curly braces. Column 1 reports the mean of each employment outcome in the control group for each sample (with standard deviation in parentheses). All regressions include demographic and employment controls (age, sex, age-sex interactions, race/ethnicity, Cigna coverage status, full-time status, paid hourly status, and job category) and cluster standard errors at the club (for employee-level regressions). Employee-level regressions and control means are weighted by the combination of a weight for exposure to the wellness program and a weight that balances treatment and control samples on demographics. Club-level regressions and control means are unweighted.

890

891 **Table 4: Impact on Medical Spending**

892

|                         | Employee-level               |                              |                      | Stably Employed Subsample    |                              |                      | Club-level                   |                              |                      |
|-------------------------|------------------------------|------------------------------|----------------------|------------------------------|------------------------------|----------------------|------------------------------|------------------------------|----------------------|
|                         | Mean in Control Group<br>(1) | Reduced Form (Linear)<br>(2) | 2SLS (Linear)<br>(3) | Mean in Control Group<br>(1) | Reduced Form (Linear)<br>(2) | 2SLS (Linear)<br>(3) | Mean in Control Group<br>(1) | Reduced Form (Linear)<br>(2) | 2SLS (Linear)<br>(3) |
| <b>Spending</b>         |                              |                              |                      |                              |                              |                      |                              |                              |                      |
| Total Spending          | 3975.56<br>(14784.11)        |                              |                      | 3833.69<br>(13035.30)        |                              |                      | 3989.63<br>(2420.31)         |                              |                      |
| Out-of-pocket Spending  | 781.87<br>(1213.89)          |                              |                      | 743.73<br>(1057.59)          |                              |                      | 780.47<br>(226.34)           |                              |                      |
| <i>By Site of Care:</i> |                              |                              |                      |                              |                              |                      |                              |                              |                      |
| Office                  | 2145.43<br>(7396.97)         |                              |                      | 2178.63<br>(7491.70)         |                              |                      | 2165.27<br>(1271.91)         |                              |                      |
| Inpatient Hospital      | 1157.67<br>(9284.59)         |                              |                      | 1016.85<br>(7329.21)         |                              |                      | 1152.71<br>(1400.39)         |                              |                      |
| Emergency Room          | 529.27<br>(1759.02)          |                              |                      | 497.16<br>(1614.33)          |                              |                      | 528.43<br>(309.13)           |                              |                      |
| Urgent Care             | 25.64<br>(109.20)            |                              |                      | 25.13<br>(104.21)            |                              |                      | 25.68<br>(20.03)             |                              |                      |
| Other                   | 117.55<br>(1343.70)          |                              |                      | 115.93<br>(1406.94)          |                              |                      | 117.55<br>(188.61)           |                              |                      |
| N                       | 7631                         |                              |                      | 6016                         |                              |                      | 160                          |                              |                      |

893 **Notes:** Table reports the coefficient on TREATMENT from estimating equation (1) by OLS (column 2), and the coefficient on PARTICIPATION from  
894 estimating equation (2) by IV (column 3). Standard errors are listed in parentheses with p-values in brackets and family-wise p-values in curly braces. Column 1  
895 reports the mean of each medical spending and utilization outcome in the control group for each sample (with standard deviation in parentheses). All regressions  
896 include demographic and employment controls (age, sex, age-sex interactions, race/ethnicity, full-time status, paid hourly status, and job category) and cluster  
897 standard errors at the club (for employee-level regressions). Employee-level regressions and control means are weighted by the combination of a weight for  
898 exposure to the wellness program and a weight that balances treatment and control samples on demographics. Club-level regressions and control means are  
899 unweighted.

900 **Table 5: Impact on Medical Utilization**  
 901

|                            | Employee-level              |                       |               | Stably Employed Subsample   |                       |               | Club-level                  |                       |               |
|----------------------------|-----------------------------|-----------------------|---------------|-----------------------------|-----------------------|---------------|-----------------------------|-----------------------|---------------|
|                            | Mean Value in Control Group | Reduced Form (Linear) | 2SLS (Linear) | Mean Value in Control Group | Reduced Form (Linear) | 2SLS (Linear) | Mean Value in Control Group | Reduced Form (Linear) | 2SLS (Linear) |
|                            | (1)                         | (2)                   | (3)           | (1)                         | (2)                   | (3)           | (1)                         | (2)                   | (3)           |
| <b>Utilization</b>         |                             |                       |               |                             |                       |               |                             |                       |               |
| <i>By Site of Care:</i>    |                             |                       |               |                             |                       |               |                             |                       |               |
| Any Physician Visit (%)    | 71.87<br>(44.96)            |                       |               | 75.15<br>(43.22)            |                       |               | 71.75<br>(7.90)             |                       |               |
| Number of Physician Visits | 3.23<br>(4.13)              |                       |               | 3.29<br>(4.06)              |                       |               | 3.22<br>(0.75)              |                       |               |
| Any Hospitalization (%)    | 6.70<br>(25.00)             |                       |               | 6.64<br>(24.89)             |                       |               | 6.67<br>(3.74)              |                       |               |
| Number of Hospitalizations | 0.07<br>(0.33)              |                       |               | 0.06<br>(0.30)              |                       |               | 0.07<br>(0.05)              |                       |               |
| Any ER Visit (%)           | 21.52<br>(41.10)            |                       |               | 22.17<br>(41.55)            |                       |               | 21.49<br>(7.50)             |                       |               |
| Number of ER Visits        | 0.26<br>(0.67)              |                       |               | 0.23<br>(0.56)              |                       |               | 0.26<br>(0.11)              |                       |               |

|                                  |                  |                  |                  |
|----------------------------------|------------------|------------------|------------------|
| Any Urgent Care Visit (%)        | 13.16<br>(33.81) | 13.71<br>(34.40) | 13.36<br>(7.55)  |
| Number of Urgent Care Visits     | 0.14<br>(0.47)   | 0.14<br>(0.44)   | 0.15<br>(0.09)   |
| Any Preventive Care Visit (%)    | 36.03<br>(48.01) | 38.86<br>(48.75) | 35.96<br>(10.78) |
| Number of Preventive Care Visits | 0.36<br>(0.57)   | 0.37<br>(0.53)   | 0.36<br>(0.12)   |
| N                                | 7631             | 6016             | 160              |

902 **Notes:** Table reports the coefficient on TREATMENT from estimating equation (1) by OLS (column 2), and the coefficient on PARTICIPATION from  
903 estimating equation (2) by IV (column 3). Standard errors are listed in parentheses with p-values in brackets and family-wise p-values in curly braces. Column 1  
904 reports the mean of each medical spending and utilization outcome in the control group for each sample (with standard deviation in parentheses). All regressions  
905 include demographic and employment controls (age, sex, age-sex interactions, race/ethnicity, full-time status, paid hourly status, and job category) and cluster  
906 standard errors at the club (for employee-level regressions). Employee-level regressions and control means are weighted by the combination of a weight for  
907 exposure to the wellness program and a weight that balances treatment and control samples on demographics. Club-level regressions and control means are  
908 unweighted.

909 **Table 6: Impact on Prescription Pharmaceutical Spending and Utilization**

910

|                             | Employee-level        |                       |               | Stably Employed Subsample |                       |               | Club-level            |                       |               |
|-----------------------------|-----------------------|-----------------------|---------------|---------------------------|-----------------------|---------------|-----------------------|-----------------------|---------------|
|                             | Mean in Control Group | Reduced Form (Linear) | 2SLS (Linear) | Mean in Control Group     | Reduced Form (Linear) | 2SLS (Linear) | Mean in Control Group | Reduced Form (Linear) | 2SLS (Linear) |
|                             | (1)                   | (2)                   | (3)           | (1)                       | (2)                   | (3)           | (1)                   | (2)                   | (3)           |
| <b>Rx Spending</b>          |                       |                       |               |                           |                       |               |                       |                       |               |
| Total Spending              | 1221.15<br>(7467.09)  |                       |               | 1147.81<br>(5346.43)      |                       |               | 1207.99<br>(1230.27)  |                       |               |
| Out-of-pocket Spending      | 93.93<br>(170.24)     |                       |               | 98.42<br>(172.56)         |                       |               | 94.14<br>(28.73)      |                       |               |
| <b>Rx Utilization</b>       |                       |                       |               |                           |                       |               |                       |                       |               |
| Any Medications (%)         | 58.65<br>(49.25)      |                       |               | 61.62<br>(48.64)          |                       |               | 58.60<br>(8.57)       |                       |               |
| No. of Distinct Medications | 4.02<br>(4.75)        |                       |               | 4.29<br>(4.81)            |                       |               | 4.01<br>(0.90)        |                       |               |
| Total Medication-Months     | 11.10<br>(19.79)      |                       |               | 11.64<br>(20.18)          |                       |               | 11.07<br>(3.85)       |                       |               |
| <i>By Category:</i>         |                       |                       |               |                           |                       |               |                       |                       |               |
| Any Asthma Medications (%)  | 11.82<br>(32.29)      |                       |               | 12.63<br>(33.22)          |                       |               | 11.75<br>(5.23)       |                       |               |

|                                         |                  |                  |                 |
|-----------------------------------------|------------------|------------------|-----------------|
| No. of Asthma Medication-Months         | 0.51<br>(2.50)   | 0.52<br>(2.50)   | 0.50<br>(0.41)  |
| Any Cardiovascular Medications (%)      | 22.36<br>(41.67) | 23.92<br>(42.66) | 22.09<br>(7.76) |
| No. of Cardiovascular Medication-Months | 2.57<br>(6.54)   | 2.73<br>(6.70)   | 2.53<br>(1.13)  |
| Any Diabetes Medications (%)            | 7.09<br>(25.67)  | 7.52<br>(26.37)  | 6.92<br>(3.99)  |
| No. of Diabetes Medication-Months       | 0.96<br>(4.55)   | 1.02<br>(4.74)   | 0.92<br>(0.70)  |
| Any Hyperlipidemia Meds (%)             | 14.00<br>(34.70) | 15.11<br>(35.81) | 13.72<br>(6.20) |
| No. of Hyperlipidemia Medication-Months | 1.15<br>(3.50)   | 1.22<br>(3.58)   | 1.13<br>(0.63)  |
| Any Mental Health Medications (%)       | 17.51<br>(38.01) | 18.20<br>(38.59) | 17.83<br>(7.22) |
| No. of Mental Health Medication-Months  | 1.66<br>(5.33)   | 1.72<br>(5.40)   | 1.70<br>(1.05)  |



|                                     |                  |                  |                 |
|-------------------------------------|------------------|------------------|-----------------|
| Any Pain Medications (%)            | 17.62<br>(38.10) | 18.68<br>(38.98) | 17.60<br>(7.20) |
| No. of Pain Medication-Months       | 0.75<br>(2.74)   | 0.76<br>(2.78)   | 0.77<br>(0.54)  |
| Any Antibiotic Medications (%)      | 12.85<br>(33.46) | 14.16<br>(34.86) | 12.74<br>(5.54) |
| No. of Antibiotic Medication-Months | 0.39<br>(1.61)   | 0.40<br>(1.65)   | 0.39<br>(0.23)  |
| Any Other Medications (%)           | 34.36<br>(47.49) | 36.43<br>(48.13) | 34.30<br>(8.03) |
| No. of Other Medication-Months      | 3.12<br>(7.11)   | 3.27<br>(7.26)   | 3.12<br>(1.14)  |
| N                                   | 7631             | 6016             | 160             |

911 **Notes:** Table reports the coefficient on TREATMENT from estimating equation (1) by OLS (column 2), and the coefficient on PARTICIPATION from  
912 estimating equation (2) by IV (column 3). Standard errors are listed in parentheses with p-values in brackets and family-wise p-values in curly braces. Column 1  
913 reports the mean of each prescription drug spending and utilization outcome in the control group for each sample (with standard deviation in parentheses). All  
914 regressions include demographic and employment controls (age, sex, age-sex interactions, race/ethnicity, full-time status, paid hourly status, and job category)  
915 and cluster standard errors at the club (for employee-level regressions). Employee-level regressions and control means are weighted by the combination of a  
916 weight for exposure to the wellness program and a weight that balances treatment and control samples on demographics. Club-level regressions and control  
917 means are unweighted.  
918

919 **Table 7: Impact on Biometrics**  
 920

|                                                 | Employee-level            |                           |                   | Stably Employed Subsample |                           |                   |
|-------------------------------------------------|---------------------------|---------------------------|-------------------|---------------------------|---------------------------|-------------------|
|                                                 | Mean in Control Group (1) | Reduced Form (Linear) (2) | 2SLS (Linear) (3) | Mean in Control Group (1) | Reduced Form (Linear) (2) | 2SLS (Linear) (3) |
| <b>Continuous Variables</b>                     |                           |                           |                   |                           |                           |                   |
| Cholesterol (mg/dl)                             | 177.60<br>(41.45)         |                           |                   | 178.89<br>(41.37)         |                           |                   |
| HDL (mg/dl)                                     | 52.98<br>(16.37)          |                           |                   | 53.55<br>(16.40)          |                           |                   |
| Glucose (mg/dl)                                 | 101.96<br>(33.50)         |                           |                   | 101.76<br>(32.06)         |                           |                   |
| Systolic BP (mmHg)                              | 124.29<br>(16.88)         |                           |                   | 124.84<br>(16.81)         |                           |                   |
| Diastolic BP (mmHg)                             | 79.70<br>(10.56)          |                           |                   | 80.09<br>(10.49)          |                           |                   |
| BMI                                             | 29.70<br>(7.09)           |                           |                   | 29.61<br>(7.00)           |                           |                   |
| <b>Binary Indicator Variables</b>               |                           |                           |                   |                           |                           |                   |
| High Cholesterol ( $\geq 200$ )                 | 29.37<br>(45.57)          |                           |                   | 30.73<br>(46.17)          |                           |                   |
| Low HDL (HDL $< 40$ )                           | 22.29<br>(41.64)          |                           |                   | 20.78<br>(40.60)          |                           |                   |
| Hypertensive (SBP $\geq 140$ or DBP $\geq 90$ ) | 23.10<br>(42.17)          |                           |                   | 24.18<br>(42.85)          |                           |                   |
| Obese (BMI $\geq 30$ )                          | 43.04<br>(49.54)          |                           |                   | 42.73<br>(49.51)          |                           |                   |

*Standardized  
treatment effect*

|   |      |      |
|---|------|------|
| N | 2168 | 1353 |
|---|------|------|

921 **Notes:** Table reports the coefficient on TREATMENT from estimating equation (1) by OLS (column 2),  
922 and the coefficient on PARTICIPATION from estimating equation (2) by IV (column 3). Standard errors  
923 are listed in parentheses with p-values in brackets and family-wise p-values in curly braces. Column 1  
924 reports the mean of each biometric outcome in the control group for each sample (with standard deviation  
925 in parentheses). All regressions include demographic and employment controls (age, sex, age-sex  
926 interactions, race/ethnicity, Cigna coverage status, full-time status, paid hourly status, and job category)  
927 and cluster standard errors at the club. Employee-level regressions and control means are weighted by the  
928 combination of a weight for exposure to the wellness program and a weight that balances treatment and  
929 control samples on demographics. Standardized treatment effect is calculated using the continuous  
930 variables.

931 **Table 8: Impact on Self-Reported PHA Responses**  
 932

|                                             | Employee-level        |                       |               | Stably Employed Subsample |                       |               |
|---------------------------------------------|-----------------------|-----------------------|---------------|---------------------------|-----------------------|---------------|
|                                             | Mean in Control Group | Reduced Form (Linear) | 2SLS (Linear) | Mean in Control Group     | Reduced Form (Linear) | 2SLS (Linear) |
|                                             | (1)                   | (2)                   | (3)           | (1)                       | (2)                   | (3)           |
| <b>Screenings and Exams</b>                 |                       |                       |               |                           |                       |               |
| Annual exam (%)                             | 65.49<br>(47.57)      |                       |               | 65.08<br>(47.71)          |                       |               |
| Flu shot (%)                                | 35.22<br>(47.79)      |                       |               | 33.48<br>(47.23)          |                       |               |
| Percent of other recommended tests received | 55.97<br>(31.03)      |                       |               | 57.15<br>(30.59)          |                       |               |
| <b>Mental Health and Well-being</b>         |                       |                       |               |                           |                       |               |
| PHQ-2 score of 3 or above (%)               | 8.57<br>(28.01)       |                       |               | 8.43<br>(27.80)           |                       |               |
| SF-8 score – physical summary score         | 50.79<br>(7.72)       |                       |               | 50.92<br>(7.72)           |                       |               |

|                                                         |                  |                  |
|---------------------------------------------------------|------------------|------------------|
| SF-8 score – mental summary score                       | 51.17<br>(9.09)  | 51.22<br>(9.09)  |
| Stress at work (%)                                      | 55.60<br>(49.71) | 58.12<br>(49.38) |
| Unmanaged stress (%)                                    | 41.77<br>(49.35) | 41.38<br>(49.30) |
| <b>Sleep</b>                                            |                  |                  |
| Good quality, adequate amount of sleep (%)              | 54.16<br>(49.85) | 54.54<br>(49.83) |
| <b>Physical Activity</b>                                |                  |                  |
| Regular exercise (%)                                    | 61.88<br>(48.59) | 63.20<br>(48.27) |
| Three or more days per week of moderate exercise (%)    | 63.95<br>(48.04) | 64.10<br>(48.01) |
| Number of days per week intentionally increase activity | 3.05<br>(2.37)   | 3.07<br>(2.36)   |
| Number of hours sitting per day                         | 3.49<br>(1.73)   | 3.49<br>(1.73)   |

**Nutrition**

|                                                                                        |                  |                  |
|----------------------------------------------------------------------------------------|------------------|------------------|
| Number of meals eaten out                                                              | 1.85<br>(1.56)   | 1.82<br>(1.54)   |
| Number of naturally or artificially sweetened drinks per day                           | 1.84<br>(1.86)   | 1.80<br>(1.84)   |
| Read the Nutrition Facts panel (%)                                                     | 58.74<br>(49.26) | 58.48<br>(49.32) |
| Consume at least 2 cups of fruit and 2.5 cups of vegetables per day (%)                | 57.55<br>(49.45) | 57.31<br>(49.50) |
| Choose whole grain foods and reduced fat foods more often than the regular variety (%) | 33.23<br>(47.13) | 34.61<br>(47.61) |
| <b>Weight Management</b>                                                               |                  |                  |
| Considering losing weight in the next 6 months (%)                                     | 56.26<br>(49.63) | 56.45<br>(49.63) |

|                                                 |                  |                  |
|-------------------------------------------------|------------------|------------------|
| Actively managing weight (%)                    | 54.68<br>(49.81) | 54.72<br>(49.82) |
| <b>Tobacco Use</b>                              |                  |                  |
| Smoker (%)                                      | 24.68<br>(43.14) | 24.63<br>(43.12) |
| <b>Alcohol Use</b>                              |                  |                  |
| Number of drinks per week                       | 4.65<br>(7.41)   | 4.72<br>(7.38)   |
| <b>Medical Utilization</b>                      |                  |                  |
| Number doctor visits in last 12 months          | 1.52<br>(1.12)   | 1.53<br>(1.11)   |
| Any doctor visit in last 12 months (%)          | 75.56<br>(43.00) | 76.08<br>(42.69) |
| Any ER visit in last 12 months (%)              | 25.84<br>(43.80) | 25.32<br>(43.52) |
| Ever hospital patient in the last 12 months (%) | 17.54<br>(38.05) | 17.55<br>(38.07) |

|                                                                     |                  |                  |
|---------------------------------------------------------------------|------------------|------------------|
| Days spent in hospital                                              | 0.43<br>(1.37)   | 0.43<br>(1.40)   |
| Number different prescriptions last 12 months                       | 1.32<br>(1.64)   | 1.31<br>(1.64)   |
| Any prescriptions in last 12 months (%)                             | 52.91<br>(49.94) | 52.39<br>(49.98) |
| <i>Standardized treatment effect (mental health and well-being)</i> |                  |                  |
| <i>Standardized treatment effect (health behaviors)</i>             |                  |                  |
| N                                                                   | 2168             | 1353             |

933 **Notes:** Table reports the coefficient on TREATMENT from estimating equation (1) by OLS (column 2), and the coefficient on PARTICIPATION  
934 from estimating equation (2) by IV (column 3). Standard errors are listed in parentheses with p-values in brackets and family-wise p-values in  
935 curly braces. Column 1 reports the mean of each self-reported health outcome in the control group for each sample (with standard deviation in  
936 parentheses). All regressions include demographic and employment controls (age, sex, age-sex interactions, race/ethnicity, Cigna coverage status,  
937 full-time status, paid hourly status, and job category) and cluster standard errors at the club. Employee-level regressions and control means are  
938 weighted by the combination of a weight for exposure to the wellness program and a weight that balances treatment and control samples on  
939 demographics. Standardized treatment effect for mental health and well-being is calculated using the outcomes under *Mental Health and Well-*  
940 *being* and the standardized treatment effect for health behaviors uses the outcomes under *Screenings and Exams, Sleep, Physical Activity,*  
941 *Nutrition, Weight Management, Tobacco Use, and Alcohol Use.*



942 **Table 9. Summary of Demographic Characteristics for Employees in Control Clubs**

943

944

|                        | Employee-level |      |       | Stably Employed<br>Subsample |      |       | Club-level |       |
|------------------------|----------------|------|-------|------------------------------|------|-------|------------|-------|
|                        | All-in         | PHA  | Cigna | All-in                       | PHA  | Cigna | All-in     | Cigna |
| Age (yrs)              | 39.2           | 40.6 | 45.0  | 41.3                         | 41.3 | 45.5  | 39.3       | 40.3  |
| Female (%)             | 45.8           | 56.3 | 46.6  | 46.1                         | 56.9 | 46.6  | 45.8       | 44.8  |
| <b>Race (%)</b>        |                |      |       |                              |      |       |            |       |
| White                  | 54.1           | 60.8 | 60.7  | 55.8                         | 61.0 | 60.7  | 57.8       | 66.6  |
| Black                  | 21.2           | 18.7 | 17.5  | 19.6                         | 18.3 | 17.3  | 20.0       | 14.7  |
| Hispanic               | 18.5           | 16.7 | 16.8  | 18.6                         | 16.7 | 17.1  | 16.6       | 14.9  |
| Other race             | 6.2            | 3.8  | 5.1   | 6.0                          | 3.9  | 5.0   | 5.6        | 3.8   |
| <b>Employment (%)</b>  |                |      |       |                              |      |       |            |       |
| Full-time salary       | 13.0           | 17.3 | 24.4  | 15.9                         | 20.0 | 25.5  | 13.7       | 42.7  |
| Full-time hourly       | 47.5           | 49.0 | 65.4  | 46.1                         | 47.7 | 68.2  | 46.9       | 33.9  |
| Part-time hourly       | 39.6           | 33.7 | 10.2  | 38.0                         | 32.3 | 6.3   | 39.4       | 23.5  |
| <b>Worker Type (%)</b> |                |      |       |                              |      |       |            |       |
| Sales worker           | 35.6           | 36.0 | 20.8  | 32.2                         | 33.2 | 19.4  | 35.8       | 24.3  |
| Nonsales worker        | 47.6           | 41.8 | 51.6  | 48.5                         | 41.9 | 51.8  | 46.8       | 30.4  |
| Other worker           | 16.8           | 22.3 | 27.6  | 19.3                         | 24.9 | 28.8  | 17.4       | 45.3  |
| N                      | 32973          | 2168 | 7631  | 15344                        | 1353 | 6016  | 160        | 160   |

**Notes:** Table lists demographic characteristics for the sample covered by Cigna weighted by months of Cigna coverage. About 35% of the total sample has Cigna coverage. Age is defined as age at the mid-point of the treatment period (October 2015). This is different from the balance table where age is defined as of December, 2014 (pre-treatment). Thus the means of age in this table are larger than those in the balance table across all samples. The PHA subgroup includes all employees who answered at least one question on the PHA survey, including individuals who moved into a primary club during their employment and were eligible to take the PHA but have their treatment status marked by the first club they were in (a secondary control).

945 **Table 10: Balance Between Treatment and Control—Employee Level**

946

947 **Panel A: All Employees – Exposure Weights Only**

|                     | (1)                   | (2)                            | (3)                                            | (4)                   | (5)                   |
|---------------------|-----------------------|--------------------------------|------------------------------------------------|-----------------------|-----------------------|
|                     | Treatment<br>(n=4037) | Primary<br>Control<br>(n=4106) | Primary +<br>Secondary<br>Control<br>(n=28936) | (1) vs (2)<br>P value | (1) vs (3)<br>P value |
| <b>Demographics</b> |                       |                                |                                                |                       |                       |
| Age (yrs)           | 39.5                  | 38.1                           | 38.4                                           | 0.057                 | 0.040                 |
| Female (%)          | 48.0                  | 46.3                           | 45.8                                           | 0.380                 | 0.168                 |
| Race (%)            |                       |                                |                                                | 0.047                 | 0.181                 |
| Black               | 16.1                  | 20.4                           | 21.2                                           |                       |                       |
| White               | 67.8                  | 58.5                           | 54.1                                           |                       |                       |
| Hispanic            | 10.6                  | 17.5                           | 18.5                                           |                       |                       |
| Other               | 5.4                   | 3.6                            | 6.2                                            |                       |                       |

948 **Notes:** Demographic characteristics are plausibly unaffected by the treatment. Data are from the Team Member  
949 database supplied by BJ's and based on the first entry for an individual during the treatment period. Age is defined  
950 as of December, 2014 (pre-treatment). Column 1 reports the means for employees in the treatment group while  
951 columns 2 and 3 report the means for the primary control employees and all control employees (primary and  
952 secondary), respectively. Treatment status is defined by the first club an employee appears in during the treatment  
953 period. Column 4 reports the p-value for the comparison between employees at treatment clubs and employees at  
954 primary control clubs. Column 5 reports the p-value for the comparison between employees at treatment clubs and  
955 all employees at control clubs. All regressions are weighted by individual exposure to the treatment.

956

957 **Panel B: All Employees**

|                     | (1)                   | (2)                            | (3)                                            | (4)                   | (5)                   |
|---------------------|-----------------------|--------------------------------|------------------------------------------------|-----------------------|-----------------------|
|                     | Treatment<br>(n=4037) | Primary<br>Control<br>(n=4106) | Primary +<br>Secondary<br>Control<br>(n=28936) | (1) vs (2)<br>P value | (1) vs (3)<br>P value |
| <b>Demographics</b> |                       |                                |                                                |                       |                       |
| Age (yrs)           | 38.8                  | 38.3                           | 38.7                                           | 0.539                 | 0.839                 |
| Female (%)          | 46.4                  | 45.6                           | 46.0                                           | 0.639                 | 0.762                 |
| Race (%)            |                       |                                |                                                | 0.749                 | 0.992                 |
| Black               | 19.9                  | 20.1                           | 20.7                                           |                       |                       |
| White               | 56.3                  | 57.9                           | 55.3                                           |                       |                       |
| Hispanic            | 17.8                  | 17.1                           | 17.8                                           |                       |                       |
| Other               | 6.0                   | 5.0                            | 6.2                                            |                       |                       |

958 **Notes:** Demographic characteristics are plausibly unaffected by the treatment. Data are from the Team Member  
959 database supplied by BJ's and based on the first entry for an individual during the treatment period. Age is defined  
960 as of December, 2014 (pre-treatment). Column 1 reports the means for employees in the treatment group while  
961 columns 2 and 3 report the means for the primary control employees and all control employees (primary and  
962 secondary), respectively. Treatment status is defined by the first club an employee appears in during the treatment  
963 period. Column 4 reports the p-value for the comparison between employees at treatment clubs and employees at  
964 primary control clubs. Column 5 reports the p-value for the comparison between employees at treatment clubs and  
965 all employees at control clubs. All regressions are weighted by the combination of a weight for individual exposure  
966 to the wellness program and a weight that balances treatment and control samples on demographics.

967

968 **Panel C: PHA Sub-sample**

|                     | (1)<br>Treatment<br>(n=1080) | (2)<br>Primary Control<br>(n=1020) | (3)<br>(1) vs (2)<br>P value |
|---------------------|------------------------------|------------------------------------|------------------------------|
| <b>Demographics</b> |                              |                                    |                              |
| Age (yrs)           | 41.2                         | 40.1                               | 0.251                        |
| Female (%)          | 57.7                         | 57.3                               | 0.879                        |
| Race (%)            |                              |                                    | 0.996                        |
| Black               | 19.1                         | 19.1                               |                              |
| White               | 57.6                         | 59.0                               |                              |
| Hispanic            | 18.4                         | 16.7                               |                              |
| Other               | 5.0                          | 5.2                                |                              |

969 **Notes:** Employees are included if they answered at least 1 question on the PHA. Demographic characteristics are  
970 plausibly unaffected by the treatment. Demographics are taken from the Team Member database supplied by BJ's  
971 and based on the first entry for an individual during the treatment period. Age is defined as of December, 2014 (pre-  
972 treatment). Column 1 reports the means for employees in the treatment group while column 2 reports the means for  
973 the primary control employees. Treatment status is defined by the first club an employee appears in during the  
974 treatment period. Column 3 reports the p-value for the comparison between employees at treatment clubs and  
975 employees at primary control clubs. All regressions are weighted by the combination of a weight for individual  
976 exposure to the wellness program and a weight that balances treatment and control samples on demographics.  
977

978 **Panel D: Cigna Sub-sample**

|                     | (1)<br>Treatment<br>(n=1005) | (2)<br>Primary<br>Control<br>(n=986) | (3)<br>Primary +<br>Secondary<br>Control<br>(n=6626) | (4)<br>(1) vs (2)<br>P value | (5)<br>(1) vs (3)<br>P value |
|---------------------|------------------------------|--------------------------------------|------------------------------------------------------|------------------------------|------------------------------|
| <b>Demographics</b> |                              |                                      |                                                      |                              |                              |
| Age (yrs)           | 44.9                         | 43.8                                 | 44.3                                                 | 0.142                        | 0.293                        |
| Female (%)          | 47.0                         | 44.8                                 | 46.6                                                 | 0.335                        | 0.848                        |
| Race (%)            |                              |                                      |                                                      | 0.831                        | 0.989                        |
| Black               | 16.0                         | 15.3                                 | 16.9                                                 |                              |                              |
| White               | 60.8                         | 66.1                                 | 62.0                                                 |                              |                              |
| Hispanic            | 17.9                         | 14.5                                 | 16.0                                                 |                              |                              |
| Other               | 5.3                          | 4.1                                  | 5.1                                                  |                              |                              |

979 **Notes:** Employees are included if they had at least 1 month of Cigna health insurance coverage. Demographic  
980 characteristics are plausibly unaffected by the treatment. Demographics are taken from the Team Member database  
981 supplied by BJ's and based on the first entry for an individual during the treatment period. Age is defined as of  
982 December, 2014 (pre-treatment). Column 1 reports the means for employees in the treatment group while columns 2  
983 and 3 report the means for the primary control employees and all control employees (primary and secondary),  
984 respectively. Treatment status is defined by the first club an employee appears in during the treatment period.  
985 Column 4 reports the p-value for the comparison between employees at treatment clubs and employees at primary  
986 control clubs. Column 5 reports the p-value for the comparison between employees at treatment clubs and all  
987 employees at control clubs. All regressions are weighted by the combination of a weight for months of Cigna  
988 coverage and a weight that balances treatment and control samples on demographics.  
989  
990  
991

992 **Panel E: Stably Employed Sub-sample**

|                                 | (1)                   | (2)                            | (3)                                            | (4)                   | (5)                   |
|---------------------------------|-----------------------|--------------------------------|------------------------------------------------|-----------------------|-----------------------|
|                                 | Treatment<br>(n=1892) | Primary<br>Control<br>(n=1930) | Primary +<br>Secondary<br>Control<br>(n=13452) | (1) vs (2)<br>P value | (1) vs (3)<br>P value |
| <b>Demographics</b>             |                       |                                |                                                |                       |                       |
| Age (yrs)                       | 41.1                  | 40.0                           | 40.6                                           | 0.144                 | 0.384                 |
| Female (%)                      | 46.8                  | 45.4                           | 46.2                                           | 0.506                 | 0.760                 |
| Race (%)                        |                       |                                |                                                | 0.803                 | 0.973                 |
| Black                           | 18.9                  | 18.6                           | 19.1                                           |                       |                       |
| White                           | 57.1                  | 59.8                           | 57.0                                           |                       |                       |
| Hispanic                        | 18.4                  | 17.0                           | 17.9                                           |                       |                       |
| Other                           | 5.6                   | 4.6                            | 6.0                                            |                       |                       |
| <b>Employment</b>               |                       |                                |                                                |                       |                       |
| Worker type (%)                 |                       |                                |                                                | 0.676                 | 0.158                 |
| FT salary                       | 15.3                  | 15.0                           | 16.2                                           |                       |                       |
| FT hourly                       | 44.9                  | 47.1                           | 46.2                                           |                       |                       |
| PT hourly                       | 39.8                  | 37.9                           | 37.5                                           |                       |                       |
| Annual rate (\$)                |                       |                                |                                                |                       |                       |
| FT salary                       | 49504                 | 47776                          | 48654                                          | 0.139                 | 0.451                 |
| FT hourly                       | 25722                 | 24533                          | 25298                                          | 0.088                 | 0.439                 |
| PT hourly                       | 10302                 | 9982                           | 10034                                          | 0.084                 | 0.085                 |
| Standard Hours Per Week         |                       |                                |                                                |                       |                       |
| FT salary                       | 40.0                  | 40.0                           | 40.0                                           | -                     | 0.090                 |
| FT hourly                       | 35.7                  | 35.9                           | 36.0                                           | 0.523                 | 0.173                 |
| PT hourly                       | 20.0                  | 20.0                           | 20.0                                           | 0.308                 | 0.404                 |
| Job Category (%)                |                       |                                |                                                | 0.736                 | 0.312                 |
| Sales workers                   | 34.4                  | 32.6                           | 32.0                                           |                       |                       |
| Laborers/Helpers                | 19.9                  | 20.5                           | 20.4                                           |                       |                       |
| Operatives                      | 16.2                  | 15.4                           | 15.9                                           |                       |                       |
| Service workers                 | 11.6                  | 13.1                           | 12.2                                           |                       |                       |
| First/Mid level officials       | 11.5                  | 11.4                           | 12.5                                           |                       |                       |
| Admin Support                   | 4.3                   | 4.4                            | 5.1                                            |                       |                       |
| Other                           | 2.0                   | 2.6                            | 2.0                                            |                       |                       |
| <b>Health Insurance</b>         |                       |                                |                                                |                       |                       |
| Ever Enrolled in Cigna (2014)   | 49.9                  | 50.0                           | 48.2                                           | 0.933                 | 0.150                 |
| Months in Cigna                 | 11.5                  | 11.5                           | 11.6                                           | 0.914                 | 0.534                 |
| Total medical spending (mean)   | 5388                  | 3160                           | 4187                                           | 0.087                 | 0.344                 |
| Total medical spending (median) | 996                   | 874                            | 984                                            |                       |                       |

993 **Notes:** Employees are included if they were part of the stably employed subsample. All variables are pre-  
994 randomization characteristics. Demographics and employment characteristics are taken from the Team Member  
995 database supplied by BJ's and based on a December, 2014 snapshot of the employee's position. Age is defined as of  
996 December, 2014 (pre-treatment). Column 1 reports the means for employees in the treatment group while columns 2

997 and 3 report the means for the primary control employees and all control employees (primary and secondary),  
998 respectively. Treatment status is defined by the first club an employee appears in during the treatment period.  
999 Column 4 reports the p-value for the comparison between employees at treatment clubs and employees at primary  
1000 control clubs. Column 5 reports the p-value for the comparison between employees at treatment clubs and all  
1001 employees at control clubs. All regressions are weighted by the combination of a weight for individual exposure to  
1002 the wellness program and a weight that balances treatment and control samples on demographics.  
1003  
1004

1005 **Table 11: Balance Between Treatment and Control—Club Level**  
 1006

|                              | (1)          | (2)          | (3)           | (1) vs (2) | (1) vs (3) |
|------------------------------|--------------|--------------|---------------|------------|------------|
|                              | Treatment    | Primary      | Primary +     | (1) vs (2) | (1) vs (3) |
|                              | (n=20 clubs) | Control      | Secondary     | P value    | P value    |
|                              |              | (n=20 clubs) | Control       |            |            |
|                              |              |              | (n=140 clubs) |            |            |
| <b>Employee Demographics</b> |              |              |               |            |            |
| Age (yrs)                    | 39.4         | 38.1         | 38.4          | 0.092      | 0.065      |
| Female (%)                   | 48.9         | 46.0         | 45.8          | 0.137      | 0.049      |
| Race (%)                     |              |              |               | 0.006      | 0.164      |
| Black                        | 18.0         | 20.3         | 20.0          |            |            |
| White                        | 68.0         | 59.4         | 57.8          |            |            |
| Hispanic                     | 9.0          | 16.6         | 16.6          |            |            |
| Other                        | 4.9          | 3.6          | 5.6           |            |            |
| <b>ACS Demographics</b>      |              |              |               |            |            |
| Age (yrs)                    | 40.7         | 39.5         | 39.6          | 0.262      | 0.220      |
| Female (%)                   | 51.2         | 51.4         | 51.3          | 0.410      | 0.718      |
| Race (%)                     |              |              |               | 0.004      | 0.013      |
| Black                        | 12.2         | 13.8         | 13.3          |            |            |
| White                        | 77.7         | 76.3         | 74.5          |            |            |
| Hispanic                     | 9.4          | 15.4         | 13.8          |            |            |
| Other                        | 10.1         | 9.8          | 12.2          |            |            |

1007 **Notes:** Demographic characteristics are plausibly unaffected by the treatment. Employee demographics  
 1008 are taken from the Team Member database supplied by BJ's and based on the first entry for an individual  
 1009 during the treatment period. Age is defined as of December, 2014 (pre-treatment). ACS demographics are  
 1010 taken from the 2015 American Community Survey (ACS) Population Estimates for the county each club  
 1011 is located in. Club-level analyses are obtained by first calculating a weighted average for each club  
 1012 (weighted by an employee's hours worked during the treatment period). Column 1 reports the means for  
 1013 employees in the treatment group while columns 2 and 3 report the means for the primary control  
 1014 employees and all control employees (primary and secondary), respectively. Treatment status is defined  
 1015 by the first club an employee appears in during the treatment period. Column 4 reports the p-value for the  
 1016 comparison between the employees at treatment clubs and the employees at primary control clubs and  
 1017 column 5 reports the p-value for the comparison between the employees at treatment clubs and all  
 1018 employees at control clubs.  
 1019

1020 **Table 12: Summary Statistics for Weights**

1021

1022

1023 **Panel A: Exposure Weights**

|                    | (1)<br>All Employees, Control<br>(n = 28,936) | (2)<br>Stably Employed Sub-Sample,<br>Control (n = 13,452) |
|--------------------|-----------------------------------------------|------------------------------------------------------------|
| Mean               | 0.38                                          | 0.61                                                       |
| Standard Deviation | 0.32                                          | 0.29                                                       |
| Percentiles:       |                                               |                                                            |
| Min                | 0.00008                                       | 0.008                                                      |
| 1 %                | 0.002                                         | 0.05                                                       |
| 5%                 | 0.008                                         | 0.10                                                       |
| 10%                | 0.02                                          | 0.16                                                       |
| 25%                | 0.08                                          | 0.36                                                       |
| 50% (Median)       | 0.28                                          | 0.68                                                       |
| 75%                | 0.68                                          | 0.86                                                       |
| 90%                | 0.88                                          | 0.92                                                       |
| 95%                | 0.92                                          | 0.96                                                       |
| 99%                | 1.00                                          | 1.00                                                       |
| Max                | 1.00                                          | 1.00                                                       |

**Notes:** Exposure weights represent the share of the intervention period in which the individual is employed (and thus exposed to the intervention), calculated as the number of hours worked, divided by the number of hours a full-time worker would have worked during the length of the intervention, bounded between 0 (no exposure and excluded from the sample) and 1 (full-time work for the duration of the intervention). Because exposure is potentially endogenous, we only show the control group here.

1024

1025

1026 **Panel B: Balance Weights**

|                    | (1)<br>Treatment<br>(n = 4037) | (2)<br>Primary Control<br>(n = 4106) | (3)<br>Primary + Secondary<br>Control (n = 28,936) |
|--------------------|--------------------------------|--------------------------------------|----------------------------------------------------|
| Mean               | 1.00                           | 1.00                                 | 1.00                                               |
| Standard Deviation | 0.27                           | 0.08                                 | 0.04                                               |
| Percentiles:       |                                |                                      |                                                    |
| Min                | 0.73                           | 0.94                                 | 0.92                                               |
| 1%                 | 0.76                           | 0.94                                 | 0.93                                               |
| 5%                 | 0.77                           | 0.95                                 | 0.95                                               |
| 10%                | 0.78                           | 0.95                                 | 0.96                                               |
| 25%                | 0.82                           | 0.96                                 | 0.97                                               |
| 50% (Median)       | 0.86                           | 0.99                                 | 1.00                                               |
| 75%                | 1.20                           | 1.00                                 | 1.03                                               |
| 90%                | 1.26                           | 1.02                                 | 1.05                                               |
| 95%                | 1.65                           | 1.04                                 | 1.06                                               |
| 99%                | 1.69                           | 1.39                                 | 1.07                                               |
| Max                | 1.70                           | 1.43                                 | 1.07                                               |

**Notes:** Balance weights are constructed to balance age, sex, and race/ethnicity between treatment and control groups, calibrated to the distribution of these variables in the overall study sample.

1027 **Table 13: First Stage Estimates**

1028

1029 **Panel A: Employee-level—All**

|                                         | <b>All</b>             |                                 | <b>Surveyed</b>        |                                 | <b>Cigna Enrolled</b>   |                                 |
|-----------------------------------------|------------------------|---------------------------------|------------------------|---------------------------------|-------------------------|---------------------------------|
|                                         | (1)<br>Control<br>Mean | (2)<br>Estimated First<br>Stage | (3)<br>Control<br>Mean | (4)<br>Estimated First<br>Stage | (5)<br>Control<br>Means | (6)<br>Estimated First<br>Stage |
| Completed any<br>module (%)             | 0.35                   | 56.99<br>(2.48)<br>[0.00]       | 2.55                   | 77.85<br>(2.02)<br>[0.00]       | 0.54                    | 63.56<br>(2.66)<br>[0.00]       |
| Modules completed<br>(#)                | 0.01                   | 2.39<br>(0.11)<br>[0.00]        | 0.10                   | 3.83<br>(0.17)<br>[0.00]        | 0.02                    | 2.97<br>(0.16)<br>[0.00]        |
| 3 or more modules<br>(%)                | 0.21                   | 39.90<br>(1.97)<br>[0.00]       | 2.01                   | 63.27<br>(2.80)<br>[0.00]       | 0.36                    | 49.11<br>(2.93)<br>[0.00]       |
| Average total<br>incentive payment (\$) | 0.39                   | 103.69<br>(5.46)<br>[0.00]      | 3.22                   | 168.51<br>(8.17)<br>[0.00]      | 0.73                    | 169.13<br>(10.26)<br>[0.00]     |
| N                                       |                        | 32,973                          |                        | 2,168                           |                         | 7,631                           |

**Notes:** Control means and first stage estimates of the impact of TREATMENT on alternate definitions of PARTICIPATION. All regressions include demographic and employment controls (age, sex, age-sex interactions, race/ethnicity, full-time status, paid hourly status, and job category) and cluster standard errors at the club level. All samples other than the sample with Cigna coverage also include a control for whether or not the employee ever had Cigna coverage during the treatment period. Employee-level regressions are weighted by the combination of a weight for exposure to the wellness program (FTE weight) and a weight that balances treatment and control samples on demographics. Standard errors shown in parenthesis and p-values in brackets.

1030

1031



1032 **Panel B: Employee-level—Stably Employed Subsample**

|                                         | <b>All</b>             |                                 | <b>Surveyed</b>        |                                  | <b>Cigna</b>             |                                  |
|-----------------------------------------|------------------------|---------------------------------|------------------------|----------------------------------|--------------------------|----------------------------------|
|                                         | (7)<br>Control<br>Mean | (8)<br>Estimated First<br>Stage | (9)<br>Control<br>Mean | (10)<br>Estimated First<br>Stage | (11)<br>Control<br>Means | (12)<br>Estimated First<br>Stage |
| Completed any<br>module (%)             | 0.42                   | 61.73<br>(2.61)<br>[0.00]       | 2.72                   | 81.39<br>(2.12)<br>[0.00]        | 0.55                     | 64.36<br>(2.80)<br>[0.00]        |
| Modules completed<br>(#)                | 0.01                   | 2.76<br>(0.13)<br>[0.00]        | 0.10                   | 4.24<br>(0.18)<br>[0.00]         | 0.02                     | 3.08<br>(0.16)<br>[0.00]         |
| 3 or more modules<br>(%)                | 0.25                   | 45.89<br>(2.30)<br>[0.00]       | 2.10                   | 69.55<br>(2.79)<br>[0.00]        | 0.35                     | 50.51<br>(2.90)<br>[0.00]        |
| Average total<br>incentive payment (\$) | 0.46                   | 125.77<br>(6.83)<br>[0.00]      | 3.33                   | 195.02<br>(9.67)<br>[0.00]       | 0.73                     | 187.58<br>(10.61)<br>[0.00]      |
| N                                       |                        | 15,344                          |                        | 1,353                            |                          | 6,016                            |

**Notes:** Control means and first stage estimates of the impact of TREATMENT on alternate definitions of PARTICIPATION. All regressions include demographic and employment controls (age, sex, age-sex interactions, race/ethnicity, full-time status, paid hourly status, and job category) and cluster standard errors at the club level. All samples other than the sample with Cigna coverage also include a control for whether or not the employee ever had Cigna coverage during the treatment period. Employee-level regressions are weighted by the combination of a weight for exposure to the wellness program (FTE weight) and a weight that balances treatment and control samples on demographics. Standard errors shown in parentheses and p-values in brackets.

1033  
1034  
1035

1036 **Table 14: Heterogeneity**  
1037

|               | Absenteeism (%) |              | Total medical spending (\$) |              | Regular exercise (%) |              | Considering losing weight (%) |              |
|---------------|-----------------|--------------|-----------------------------|--------------|----------------------|--------------|-------------------------------|--------------|
|               | N               | Control Mean | N                           | Control Mean | N                    | Control Mean | N                             | Control Mean |
| <b>Gender</b> |                 |              |                             |              |                      |              |                               |              |
| Female        | 13339           | 2.86         | 3005                        | 4740.30      | 517                  | 56.88        | 526                           | 61.53        |
| Male          | 15597           | 2.44         | 3621                        | 3354.24      | 394                  | 68.07        | 371                           | 49.21        |
| <b>Age</b>    |                 |              |                             |              |                      |              |                               |              |
| Below 40      | 18726           | 2.48         | 2691                        | 2397.55      | 504                  | 67.59        | 480                           | 54.88        |
| 40 and above  | 10210           | 2.80         | 3935                        | 5009.16      | 407                  | 56.47        | 417                           | 57.46        |

**Notes:** N is control group size only. Control means are weighted by the combination of a weight for exposure to the wellness program and a weight that balances treatment and control samples on demographics.

1038  
1039

|               | SF-8 physical summary score |              | SF-8 mental summary score |              | Sweetened Drinks (No.) |              | BMI |              | Systolic BP (mmHg) |              |
|---------------|-----------------------------|--------------|---------------------------|--------------|------------------------|--------------|-----|--------------|--------------------|--------------|
|               | N                           | Control Mean | N                         | Control Mean | N                      | Control Mean | N   | Control Mean | N                  | Control Mean |
| <b>Gender</b> |                             |              |                           |              |                        |              |     |              |                    |              |
| Female        | 539                         | 49.93        | 539                       | 50.16        | 566                    | 1.66         | 609 | 30.31        | 612                | 120.59       |
| Male          | 408                         | 51.87        | 408                       | 52.46        | 427                    | 2.07         | 461 | 28.94        | 462                | 128.99       |
| <b>Age</b>    |                             |              |                           |              |                        |              |     |              |                    |              |
| Below 40      | 515                         | 51.97        | 515                       | 49.65        | 537                    | 2.14         | 578 | 29.13        | 581                | 119.29       |
| 40 and above  | 432                         | 49.71        | 432                       | 52.57        | 456                    | 1.58         | 492 | 30.23        | 493                | 128.82       |

**Notes:** N is control group size only. Control means are weighted by the combination of a weight for exposure to the wellness program and a weight that balances treatment and control samples on demographics.

1040  
1041

1042  
1043  
1044  
1045  
1046  
1047  
1048  
1049  
1050  
1051  
1052  
1053  
1054  
1055  
1056  
1057  
1058  
1059  
1060

**The Impact of Workplace Wellness on Health, Health Care, and Employment Outcomes:  
A Randomized Controlled Trial**

**Appendices**

Appendix 1: Description of Phase 1 Modules and Incentives

Appendix 2: Determination of the Stably Employed Subsample

1061 **Appendix 1: Description of Phase 1 Modules and Incentives**

1062

1063 **Module 1**

1064 **Take Charge of Your Health Rounds 1 and 2 (2/23/2015-3/27/2015, 4/13/2015-5/15/2015)**

1065 - Summary: These two five-week programs were presented as a series of webinars with  
1066 corresponding PowerPoints designed to help employees who participate take their health  
1067 care into their own hands. Topics covered included:

- 1068 ○ how to choose a health plan and primary care physician,
- 1069 ○ what to expect from a routine visit,
- 1070 ○ routine tests and screenings and recommended frequencies,
- 1071 ○ how to get the most from a doctor's visit,
- 1072 ○ choosing generic medications over the corresponding brand name,
- 1073 ○ staying healthy by eating well, staying active, sleeping enough, and managing  
1074 stress, and
- 1075 ○ primary care vs urgent care vs the emergency room and when to use each.

1076 - Incentive: Employees who completed the webinars and returned the verification form  
1077 received a \$25 BJ's gift card. Employees only received a gift card for completing Take  
1078 Charge one time.

1079

1080 **Module 2**

1081 **Nutrition for a Lifetime (6/1/2015-7/10/2015)**

1082 - Summary: This six-week program was presented as a series of webinar presentations or  
1083 in paper form designed to help employees who participate achieve and maintain a healthy  
1084 weight for life through the four pillars of health: nutrition, exercise, stress management,  
1085 and sleep. Topics covered included:

- 1086 ○ the negatives consequences of chronic stress and poor sleep habits and techniques  
1087 to manage stress and improve sleep,
- 1088 ○ good nutrition, including an overview on the different food groups and the  
1089 amounts of each recommended per day,
- 1090 ○ reasons for making exercise a priority and how to get the most out of a workout,
- 1091 ○ foods to limit and foods to increase in a diet,
- 1092 ○ appropriate portion sizing, especially for weight loss and weight maintenance, and  
1093 ○ choosing the right fats and the importance of fiber.

1094 - Incentive: Employees who completed 5 out of 6 webinars and returned the verification  
1095 form received a \$50 BJ's gift card. Employees with Cigna coverage received an  
1096 additional \$150 Weight Management Reimbursement in the form of a BJ's gift card for  
1097 completion.

1098

1099 **Modules 3 and 4**

1100 **Club Cardio Challenge Rounds 1 and 2 (8/10/2015-9/25/2015, 9/26/2015-11/16/2015)**

1101 - Summary: These two seven-week programs were exercise-based. Employees were  
1102 supposed to complete 20 minutes or more of cardiovascular exercise at least 3 days per  
1103 week and track their activity in an exercise log.

1104 - Incentive: Employees who completed 6 of the 7 weeks in either round 1 or round 2  
1105 earned a \$25 BJs gift card. Employees who completed 12 out of 14 weeks over both  
1106 rounds were eligible to enter a raffle at their club for a Fitbit. Employees with Cigna

1107 coverage who completed 12 out of 14 weeks received a \$150 fitness reimbursement from  
1108 Cigna on top of the raffle entry and gift card. Clubs were also in competition with the top  
1109 club based on % participation and the top club with the highest average weekly minutes  
1110 of exercise reported each receiving a trophy to display in the club, winner buttons for  
1111 employee lanyards, and bragging rights.  
1112

## 1113 **Module 5**

### 1114 **Maintain Don't Gain (11/23/2015-12/20/2015)**

- 1115 - Summary: This four-week challenge helped employees track their weight each week and  
1116 offered tips on how to add physical activity to a daily routine and substitutions for  
1117 options with fewer calories when dining out.
- 1118 - Incentive: Employees who completed at least 3 out of the 4 weeks of weight tracking and  
1119 returned the verification form received a \$25 BJ's gift card.

## 1121 **Module 6**

### 1122 **Power Down the Pressure (1/18/2016-2/19/2016)**

- 1123 - Summary: This four-week program encouraged employees to learn effective methods for  
1124 managing stress by asking them to complete at least one activity from a list of options for  
1125 the week for at least 3 days of the week. Week 1 was called "Unplug" and included  
1126 activities such as refraining from watching TV for a day or having an electronic-free meal  
1127 with family or friends. Week 2 was titled "Boost Your Mood" and included activities like  
1128 doing a random act of kindness, getting 8 hours of sleep, or spending time with a friend.  
1129 Week 3 was "Exercise" and asked employees to take a new exercise class or do a 30-  
1130 minute workout/activity outdoors. The final week was called "Relaxation and  
1131 Meditation" and encouraged employees to keep a stress journal, color, and meditate.
- 1132 - Incentive: Employees who completed all four weeks of the program by completing at  
1133 least 3 days of stress management activities a week and returned the verification form  
1134 received a \$25 BJ's gift card.

## 1136 **Module 7**

### 1137 **Weight Loss Boot Camp (3/14/2016-4/8/2016)**

- 1138 - Summary: This four-week program aimed to teach employees methods for losing weight.  
1139 For each of the four weeks, employees had to complete four activities (eating five or  
1140 more servings of fruits and vegetables, exercising for at least 30 minutes, avoiding  
1141 sweetened beverages, and weighing themselves weekly) a minimum number of days each  
1142 week, from two days the first week up to five days the final week.
- 1143 - Incentive: Employees who completed all four weeks and returned the verification form  
1144 received a \$25 BJ's gift card.

## 1146 **Module 8**

### 1147 **Movin' in May (5/1/2016-5/31/2016)**

- 1148 - Summary: This four-week program encouraged employees to exercise for at least 30  
1149 minutes 3 days per week and track their exercise.
- 1150 - Incentive: Employees who completed all four weeks of the challenge and returned the  
1151 verification form were entered to win one of two \$250 Visa gift cards at their club.  
1152

1153 **Appendix 2. Determination of the Stably Employed Subsample**

1154

1155 We conducted an analysis of the duration of employment (tenure), which informed our definition  
 1156 of the pre-specified stably employed subsample. In this analysis of tenure is described below, the  
 1157 nomenclature “TM” stands for “team members,” the way that BJ’s refers to employees.

1158

1159 Figure 1A looks at a number of scenarios where we take samples of treatment (T) and control  
 1160 (C) workers who were employed for varying numbers of consecutive weeks starting on 1/1/2014.

1161 In each scenario, we follow the samples of workers until they reach 1/1/2015 and look at how  
 1162 many of them are still employed. To be precise, for each restriction criterion of the number of  
 1163 consecutive weeks worked starting 1/1/2014 (X axis), the height of the dark blue bar (C 14)  
 1164 depicts the total number of control workers in the sample and the height of the light blue bar (C  
 1165 15) depicts the total number of control workers who were still working on 1/1/2015.

1166 Analogously, the height of the black bar (T 14) represents treatment workers who started in the  
 1167 sample on 1/1/2014 and the height of the gray bar (T 15) represents treatment workers who were  
 1168 still working on 1/1/2015. Of note, the bars are overlapping for each X (i.e. they are not stacked;  
 1169 rather they all originate at 0). The solid and dotted lines merely reflect the percentages of C and  
 1170 T employees, respectively, who were still working at BJ’s on 1/1/2015 (i.e. light blue bar divided  
 1171 by dark blue bar, gray bar divided by black bar).

1172

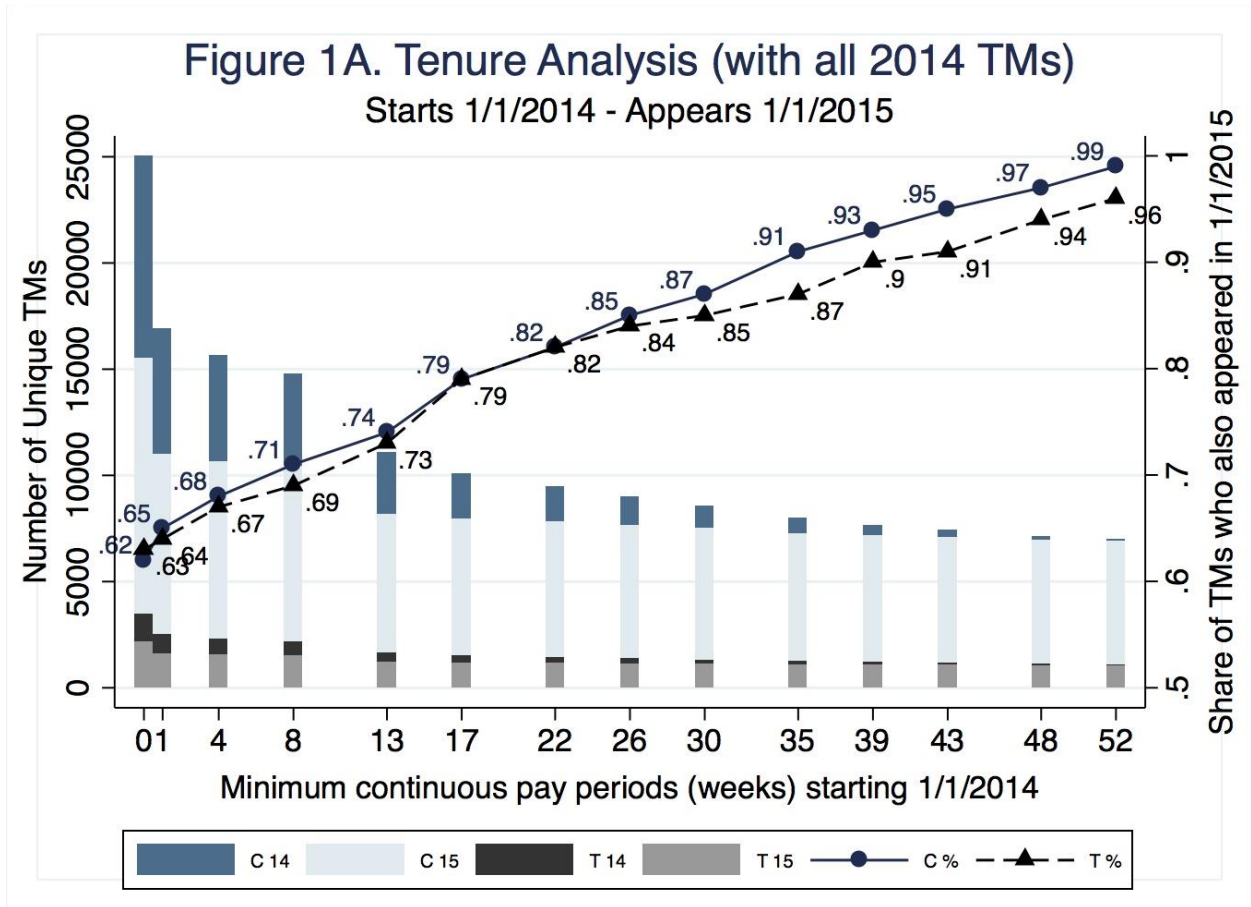

1173

1174

1175 Thus, for example, the interpretation of the bar when X=17 is as follows. There were about  
 1176 10,000 employees in control clubs who were employed at BJ's on 1/1/2014 and who worked  
 1177 through the first 17 weeks of 2014 (dark blue bar). Among these employees, about 79% (or about  
 1178 7,900) were still working on 1/1/2015 (light blue bar). The same retention of 79% was found  
 1179 among employees in treatment clubs—calculated using the gray (numerator) and black  
 1180 (denominator) bars. The bar originating at X=0 represents the case of no sample restrictions (i.e.  
 1181 all employees in the data).  
 1182

1183 Similarly, Figure 1B shows a similar analysis when we extend the definition of retention to  
 1184 12/1/2015. This graph contains only control club employees, because tenure itself may be  
 1185 affected by the wellness program and is an outcome we will examine formally in the analysis. To  
 1186 extend the above example of interpretation, of the 10,000 employees in control clubs who were  
 1187 employed through the first 17 weeks of 2014, about 64% were still employed on 12/1/2015. This  
 1188 decrease is from 79% at the beginning of 2015, implying that 15% of the sample (79% – 64% =  
 1189 15%) were “lost” from the sample (e.g. terminated, left BJ's) during the first 11 months of 2015.  
 1190

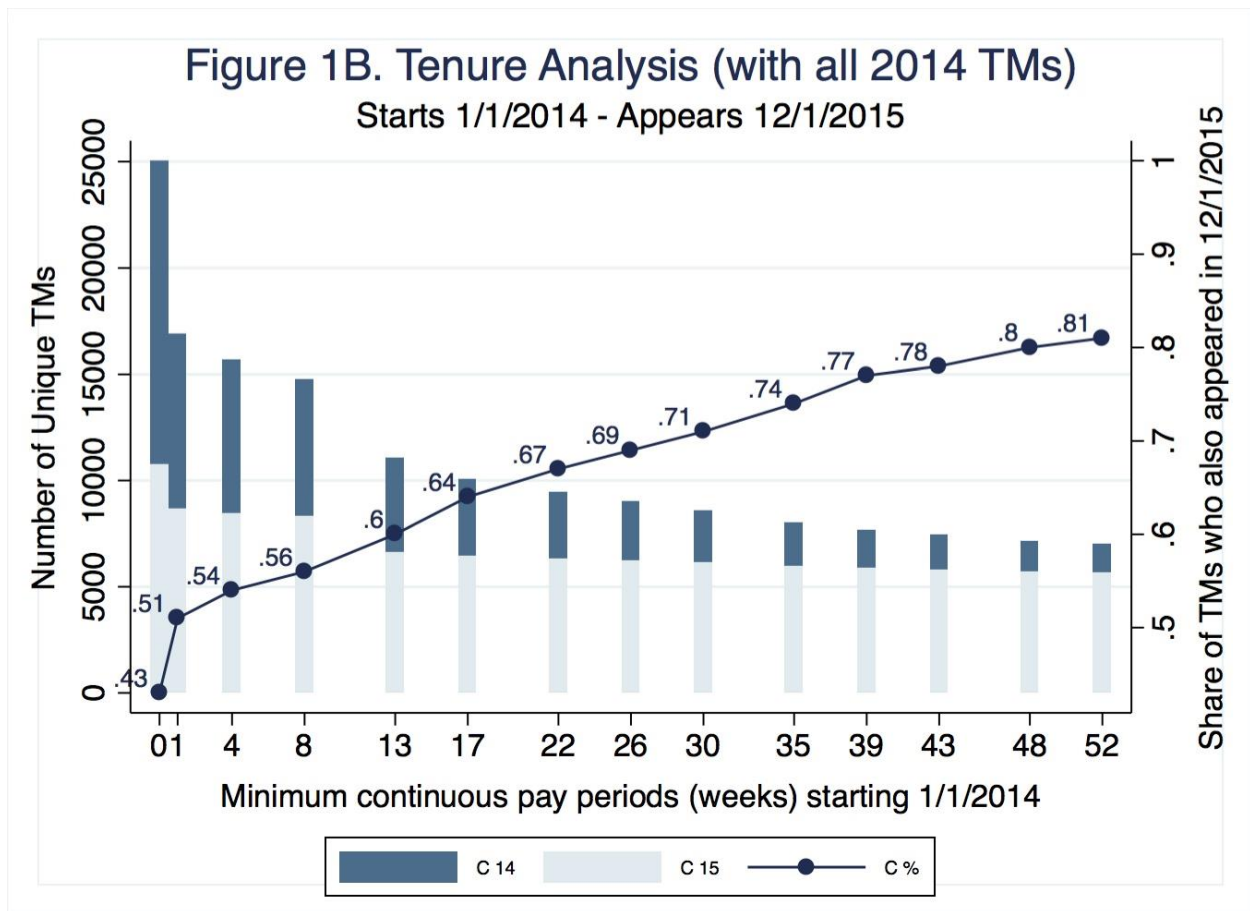

1191 Analyzing samples defined with respect to 3/1/2015 (start of the first module): Figure 2 takes a  
 1192 different approach to looking at tenure. It looks at retention for samples of employees defined  
 1193 based on the number of continuous weeks worked immediately *before* the wellness treatment  
 1194 launched (i.e. defined by counting backwards from 3/1/2015). Retention here is still defined as  
 1195 appearing in 12/1/2015. As above the figure contains only employees from control clubs.  
 1197

1198  
 1199  
 1200  
 1201  
 1202  
 1203  
 1204

As an example of interpretation, there were about 13,500 employees in control clubs who worked during the 13 continuous weeks (~3 months) before the start of the wellness program (counting back from 3/1/2015 -- i.e. Feb '15, Jan '15, and Dec '14). Among these 13,500 employees, about 10,000 remained actively working on 12/1/2015. This amounts to about a 75% retention rate.

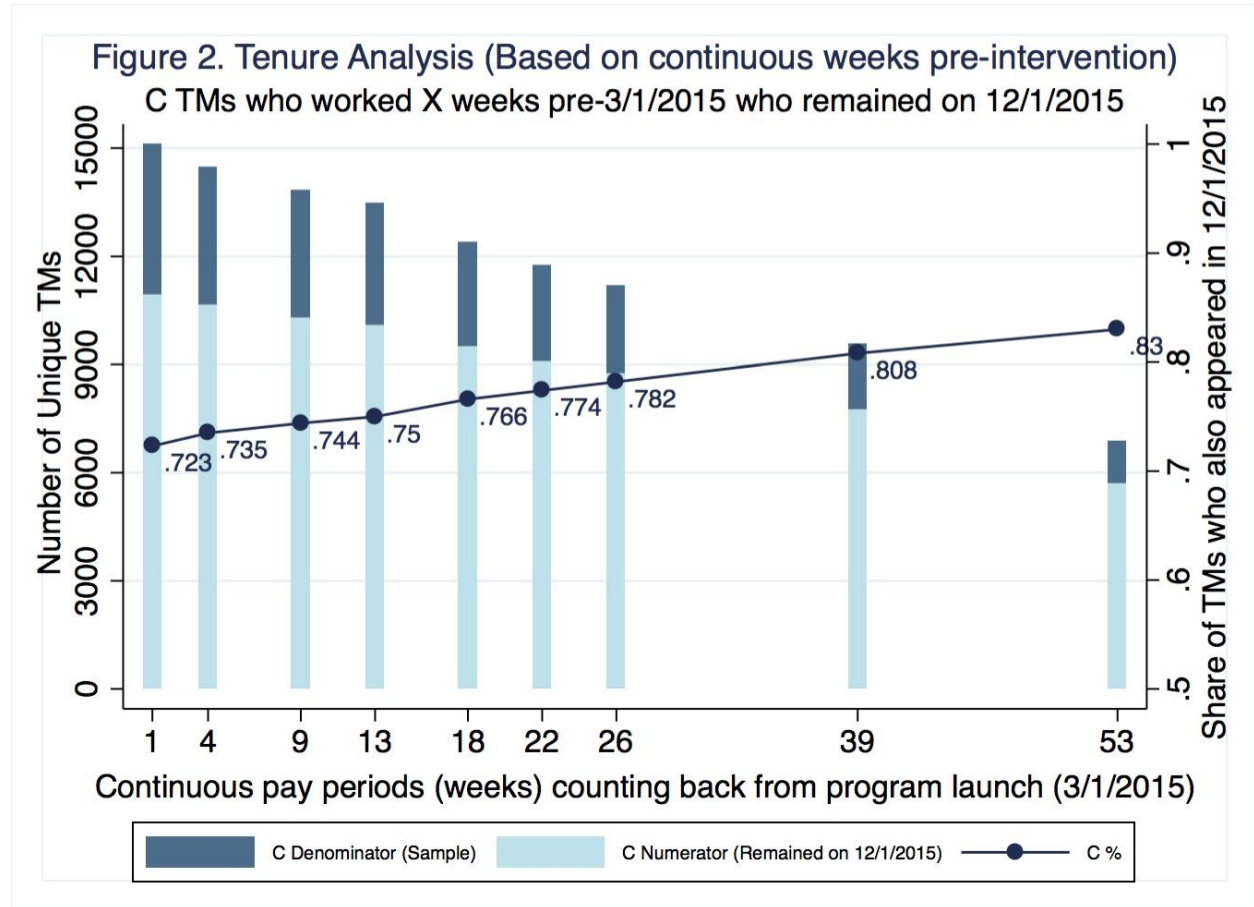

1205  
 1206  
 1207  
 1208  
 1209  
 1210  
 1211  
 1212  
 1213  
 1214  
 1215  
 1216  
 1217

We examined the rate of decline of this sample of employees among control clubs throughout the treatment. Figure 3 shows the rate of decline of the above control sample (those who worked for the 13 consecutive weeks leading up to the start of the treatment (3/1/2015), and illustrates the decline in the number and percent of this sample throughout the rest of 2015. The X axis shows the months elapsed since start of the treatment (0 is the end of February 2015, while 10 is the end of December 2015). This graph shows a smooth decline in the sample of employees to reach 75% by the end of December 2015 (consistent with Figure 2).



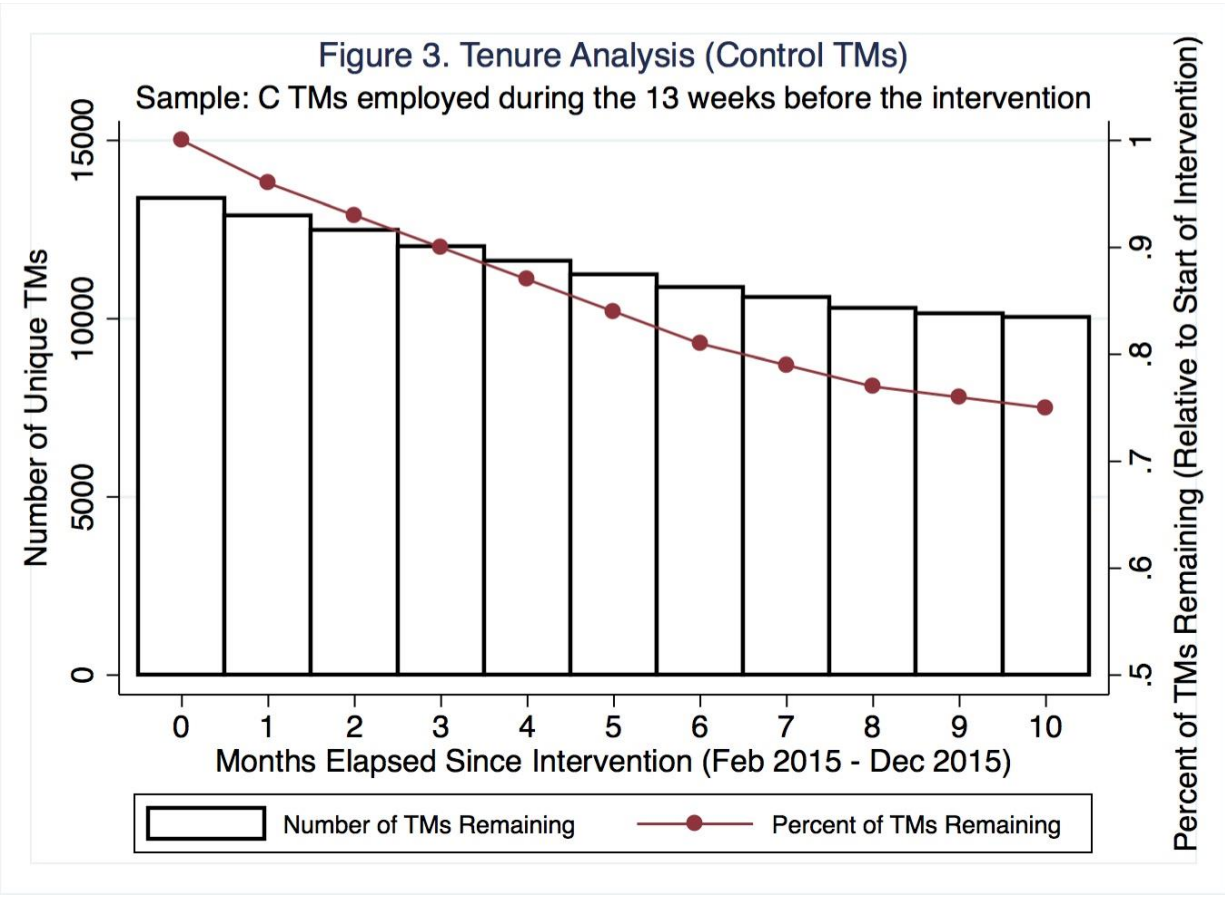

1218  
 1219
