# Supplementary material
Source: PubMed Central journal article supplement (PMC6484807)
Supplement: jama-321-1491-s003.pdf [file jama-321-1491-s003.pdf]

## Data Sharing Statement

### Data

**Data available:** Yes

**Data types:** Other (please specify)

**Additional Information:** Individual-level data involving protected health information are not available. A public use version of a de-identified analytic dataset may be available in the future.

**How to access data:** Individual-level data involving protected health information are not available. A public use version of a de-identified analytic dataset may be available in the future.

**When available:** With publication

### Supporting Documents

**Document types:** Statistical/analytic code

**How to access documents:** We have submitted the statistical analysis plan with this paper. The analysis plan can also be found on [clinicaltrials.gov](https://clinicaltrials.gov) and the American Economic Association Randomized Clinical Trials Registry. Song Z, Baicker K. The Impact of Workplace Wellness on Health, Health Care, and Employment Outcomes: A Randomized Controlled Trial, Analysis Plan-Phase 1. 2018 Mar 15. ([https://clinicaltrials.gov/ProvidedDocs/58/NCT03167658/Prot\\_SAP\\_000.pdf](https://clinicaltrials.gov/ProvidedDocs/58/NCT03167658/Prot_SAP_000.pdf))

Baicker K, Maylone B, Song Z. The Impact of Employee Wellness Programs: A Randomized Controlled Trial. American Economic Association RCT Registry. 2018 Mar 15.

(<https://www.socialscienceregistry.org/trials/586>)

**When available:** With publication

### Additional Information

**Who can access the data:** Researchers whose proposed use of the data has been approved.

**Types of analyses:** Individual-level data involving protected health information are not available. A public use version of a de-identified analytic dataset may be available in the future.

**Mechanisms of data availability:** With investigator support, after approval of a proposal, and with a signed data access agreement.

**Any additional restrictions:** No attempts to identify any individual or publish protected health information (PHI) contained in the dataset, even anonymous PHI, at the individual level. Please direct any questions on the use of deidentified data for replication purposes to the authors.
